# Supplementary material for: Transient protein-protein interactions perturb E. coli metabolome and cause gene dosage toxicity
Source: eLife. 2016 Dec 10;5:e20309. doi: 10.7554/eLife.20309 (PMC5176355; doi:10.7554/eLife.20309)
Supplement: Figure 1—source data 1. — DOI: http://dx.doi.org/10.7554/eLife.20309.003 [file elife-20309-fig1-data1.xlsx]

## Sheet: Sheet1
Figure 1: Source Data 1
Over-expression data at 37°C
	growth rate	err	relative growth ratea	abundanceb
BW27783, no plasmid	0.0200835	0.000482365		1
pBAD-EcDHFR, no arabinose	0.0174	0.000208	100	5.04
pBAD-EcDHFR, 1.22e-5% ara	0.0163	0.000569	93.6782	52.1104
pBAD-EcDHFR, 1.95e-4% ara	0.0116	0.000153	66.6667	163.772
pBAD-EcDHFR, 3.13e-3% ara	0.00708	6.2e-05	40.6897	395.968
pBAD-EcDHFR, 0.05% ara	0.00474	0.000168	27.2414	848.216
Down-regulation data at 30°C
	growth rate	err	relative growth ratec	abundanced
MG1655	0.0111935	0.000607803
B3 strain + 0.6mM IPTG	0.011492	0.000144	100	1
	0.01142	0.000144	99.3735	0.6
	0.010653	0.000134	92.6993	0.2
	0.0091083	0.000115	79.2577	0.1
	0.0072805	9.1724e-05	63.3528	0.04
	0.0068241	8.5972e-05	59.3813	0.02
	0.0066322	8.3556e-05	57.7115	0.015
	0.0064633	8.1427e-05	56.2417	0.01
	0.0061486	7.7463e-05	53.5033	0.005
	0.0058523	7.3731e-05	50.925	0
aGrowth rate was normalized relative to 'no arabinose'
bAbundance was relative to 'no plasmid' condition, which corresponds to the chromosomal expression level
cGrowth rate was normalized relative to 'B3 strain + 1mM IPTG'
dAbundance was normalized relative to 'B3 strain + 1mM IPTG'
