# Supplementary material for: Transient protein-protein interactions perturb E. coli metabolome and cause gene dosage toxicity
Source: eLife. 2016 Dec 10;5:e20309. doi: 10.7554/eLife.20309 (PMC5176355; doi:10.7554/eLife.20309)
Supplement: Figure 4—source data 1. — DOI: http://dx.doi.org/10.7554/eLife.20309.009 [file elife-20309-fig4-data1.xlsx]

## Sheet: Raw data
Figure 4: Source Data 1
Metabolomics raw data
	metabolite		colony1	colony2	colony3
	AICAR	empty plasmid	0	0	0		values listed are area under the curve for a particular metabolite (see Suppl Methods)
		ADK	0	0	0		0 indicates the metabolite was not detected
		E.coli DHFR	3.8158e+07	3.66119e+07	3.08832e+07
		DHFR 6	0	0	0
		DHFR 11	0	0	0
	dUMP	empty plasmid	0	0	0
		ADK	0	0	0
		E.coli DHFR	134309	123848	108357
		DHFR 6	11237.2	5833.78	2124.95
		DHFR 11	13161.7	0	0
	dTMP	empty plasmid	906410	937770	932531
		ADK	1.36754e+06	1.5347e+06	1.29082e+06
		E.coli DHFR	166350	127876	72352
		DHFR 6	625336	1.1436e+06	1.12734e+06
		DHFR 11	498187	751062	1.19644e+06
	dTTP	empty plasmid	61692.4	57924.3	69865.1
		ADK	103159	90271.6	85920.2
		E.coli DHFR	0	0	0
		DHFR 6	103746	89697.4	77047.8
		DHFR 11	95279	61112.5	73638.2
	AMP	empty plasmid	2.77233e+07	2.95206e+07	3.36772e+07
		ADK	3.93421e+07	4.08939e+07	4.03863e+07
		E.coli DHFR	8.38208e+06	8.0423e+06	7.15591e+06
		DHFR 6	2.81684e+07	3.41853e+07	3.42789e+07
		DHFR 11	2.16783e+07	2.29837e+07	2.89424e+07
	GMP	empty plasmid	318770	294994	308586
		ADK	239096	249251	360407
		E.coli DHFR	233898	220253	186007
		DHFR 6	307367	345309	304588
		DHFR 11	253241	303216	441805
	IMP	empty plasmid	161654	191755	121105
		ADK	189268	125377	134993
		E.coli DHFR		26506.2	18848.9
		DHFR 6		99466.8	111699
		DHFR 11		95553.1	185880

## Sheet: Normalized data
Figure 3-Supplemetary Table 1: Metabolomics data
	AICAR	dUMP	dTMP	dTTP	AMP	GMP	IMP
empty plasmid	0	0	1	1	1	1	1
ADK	0	0	1.51009	1.47429	1.32667	0.920207	0.947575
E.coli DHFR	3.52177e+07	122171	0.132019	0	0.259349	0.69405	0.143373
DHFR 6	0	6398.63	1.04306	1.42753	1.06282	1.03785	0.667523
DHFR 11	0	4387.22	0.880787	1.21399	0.809542	1.0823	0.889646
