# Supplementary material for: Transient protein-protein interactions perturb E. coli metabolome and cause gene dosage toxicity
Source: eLife. 2016 Dec 10;5:e20309. doi: 10.7554/eLife.20309 (PMC5176355; doi:10.7554/eLife.20309)
Supplement: Figure 4—source data 2. — DOI: http://dx.doi.org/10.7554/eLife.20309.010 [file elife-20309-fig4-data2.xlsx]

## Sheet: Sheet1
Figure 4-Source Data 2: Molecular and cellular properties of orthologous DHFR proteins
Orthologous DHFR strain	Organismal source of the orthologous DHFR	UNIPROT ID	Sequence Identity, %	Tm (oC)	kcata (s-1)	KM (mM)	kcat/KM (s-1mM-1)	abundance at 0.05% arabinoseb	abundance × kcat/KM
DHFR6	Listeria innocua	Q92AD5	39	50.5	81.6257	5.8968	13.8c	289.91	4000.76
DHFR11	Bordetella avium	Q2KYI7	42	62.2	78.755	8.8731	8.9c	708.651	6306.99
DHFR12	Leuconostoc mesenteroides	Q03Y56	34	43.2	46.266	1.6493	28.1d	530.883	14917.8
DHFR13	Aeromonas hydrophila	A0KNL5	59	58.5	56.858	1.6136	35.2d	523.228	18417.6
DHFR16	Clostridium cellulolyticum	B8I0T9	41	59	17.089	0.8534	20.0d	503.388	10067.8
DHFR17	Streptococcus dysgalactiae	C5WG30	29	54.5	53.28	1.6993	31.4d	197.252	6193.72
WT DHFR	Escherichia coli	P0ABQ4	100	57.5	18.3105	2.5148	7.3c	848.216	6191.97
a Estimated for 1mM of enzyme
b Abundance is fold over-expression relative to chromosomal E. coli DHFR levels
c Measured using a plate-based enzyme kinetics assay
d Measured using a stopped-flow based progress-curve analysis, data taken from Bershtein, 2015(b)
