# Supplementary material for: Transient protein-protein interactions perturb E. coli metabolome and cause gene dosage toxicity
Source: eLife. 2016 Dec 10;5:e20309. doi: 10.7554/eLife.20309 (PMC5176355; doi:10.7554/eLife.20309)
Supplement: Figure 5—source data 1. — DOI: http://dx.doi.org/10.7554/eLife.20309.014 [file elife-20309-fig5-data1.xlsx]

## Sheet: all_inter_together
Figure 5 Source Data 1: Consolidated IP data for all proteins
		anti-6×his-tag antibody			anti EcDHFR antibody								anti ADK antibody				anti-ras antibody
		BW27783-no plasmid	pBAD-DHFR11	pBAD-EcDHFR	pBAD-EcDHFR_1	pBAD-EcDHFR_2	pBAD-EcDHFR_3	MG1655_DHFR_1	MG1655_DHFR_2	DHFR3_1	DHFR3_2	DHFR3_3	pBAD-ADK_1	pBAD-ADK_2	MG1655_ADK_1	MG1655_ADK_2	pBAD-Ras	MG1655_ras_1	MG1655_ras_2
Elongation factor Tu 1 OS=Escherichia coli (strain K12) GN=tufA PE=1 SV=1	P0CE47	3	19	11	9	11	7	3	8	7	7	8	5	9	5	9	4	2	6
Dihydrofolate reductase OS=Escherichia coli (strain K12) GN=folA PE=1 SV=1	P0ABQ4	0	2	9	10	10	10	4	10	2	2	5	0	0	1	0	0	0	0
Phosphoglycerate kinase OS=Escherichia coli (strain K12) GN=pgk PE=1 SV=2	P0A799	0	5	6	5	5	3	0	2	1	0	1	1	2	1	2	0	0	0
50S ribosomal protein L15 OS=Escherichia coli (strain K12) GN=rplO PE=1 SV=1	P02413	5	8	6	3	3	3	0	3	4	1	5	3	3	2	5	0	0	0
30S ribosomal protein S6 OS=Escherichia coli (strain K12) GN=rpsF PE=1 SV=1	P02358	3	4	4	2	2	2	0	2	2	0	2	1	2	0	2	0	0	2
HTH-type transcriptional repressor AllR OS=Escherichia coli (strain K12) GN=allR PE=1 SV=1	P0ACN4	2	4	4	1	1	0	0	0	0	0	1	0	0	0	1	0	0	0
Malate dehydrogenase OS=Escherichia coli (strain K12) GN=mdh PE=1 SV=1	P61889	0	5	3	3	5	2	1	3	1	0	1	2	3	3	5	0	0	0
30S ribosomal protein S3 OS=Escherichia coli (strain K12) GN=rpsC PE=1 SV=2	P0A7V3	1	3	3	1	1	1	0	1	2	1	0	0	1	0	1	0	0	1
Transaldolase B OS=Escherichia coli (strain K12) GN=talB PE=1 SV=2	P0A870	0	3	3	3	1	0	0	2	0	0	0	0	0	0	2	0	0	0
Fructose-bisphosphate aldolase class 2 OS=Escherichia coli (strain K12) GN=fbaA PE=1 SV=2	P0AB71	0	2	3	1	2	0	0	0	0	0	0	0	0	0	0	0	0	0
Protein RecA OS=Escherichia coli (strain K12) GN=recA PE=1 SV=2	P0A7G6	0	2	2	4	4	4	0	1	2	1	5	0	0	0	0	0	0	0
Uncharacterized ABC transporter ATP-binding protein YjjK OS=Escherichia coli (strain K12) GN=yjjK PE=1 SV=2	P0A9W3	1	1	2	3	10	2	0	2	5	1	2	0	1	0	0	0	0	0
50S ribosomal protein L14 OS=Escherichia coli (strain K12) GN=rplN PE=1 SV=1	P0ADY3	0	2	2	2	3	1	0	0	0	2	1	0	0	0	0	0	0	0
2,3-bisphosphoglycerate-dependent phosphoglycerate mutase OS=Escherichia coli (strain K12) GN=gpmA PE=1 SV=2 - [GPMA_ECOLI]	P62707	0	3	2	2	2	1	0	2	0	0	1	2	1	2	0	0	0	0
Adenylosuccinate synthetase OS=Escherichia coli (strain K12) GN=purA PE=1 SV=2	P0A7D4	0	4	2	1	2	1	0	0	5	1	0	0	0	0	1	0	0	0
Serine hydroxymethyltransferase OS=Escherichia coli (strain K12) GN=glyA PE=1 SV=1	P0A825	1	3	2	1	2	1	1	1	1	1	0	1	1	2	1	0	0	0
Enolase OS=Escherichia coli (strain K12) GN=eno PE=1 SV=2	P0A6P9	0	5	2	2	2	0	0	4	0	0	1	0	1	0	2	0	0	0
UPF0438 protein YifE OS=Escherichia coli (strain K12) GN=yifE PE=1 SV=2	P0ADN2	0	1	2	1	1	0	0	0	0	0	0	0	1	0	1	0	0	0
Transcriptional regulator YqjI OS=Escherichia coli (strain K12) GN=yqjI PE=1 SV=1	P64588	2	2	2	1	1	0	0	1	2	0	2	0	0	0	0	0	2	4
Glucose-specific phosphotransferase enzyme IIA component OS=Escherichia coli (strain K12) GN=crr PE=1 SV=2	P69783	0	3	2	1	2	0	0	1	0	0	0	0	0	0	1	0	0	0
30S ribosomal protein S7 OS=Escherichia coli (strain K12) GN=rpsG PE=1 SV=3	P02359	1	2	2	0	1	0	0	0	1	0	1	0	1	0	0	0	0	0
Leucine-responsive regulatory protein OS=Escherichia coli (strain K12) GN=lrp PE=1 SV=2	P0ACJ0	0	0	2	0	3	0	1	3	0	0	0	0	0	0	0	0	0	0
30S ribosomal protein S5 OS=Escherichia coli (strain K12) GN=rpsE PE=1 SV=2	P0A7W1	2	3	1	4	6	2	0	0	5	2	4	0	0	0	0	0	0	1
50S ribosomal protein L6 OS=Escherichia coli (strain K12) GN=rplF PE=1 SV=2	P0AG55	0	0	1	3	3	1	0	4	3	1	4	0	2	0	1	0	0	1
Phosphoenolpyruvate-protein phosphotransferase OS=Escherichia coli (strain K12) GN=ptsI PE=1 SV=1	P08839	0	4	1	1	0	1	0	2	1	3	1	0	1	0	2	0	0	0
Malate synthase A OS=Escherichia coli (strain K12) GN=aceB PE=1 SV=1	P08997	0	1	1	1	1	1	0	2	1	0	0	0	1	0	2	0	0	0
Elongation factor G OS=Escherichia coli (strain K12) GN=fusA PE=1 SV=2	P0A6M8	0	4	1	1	6	1	0	1	1	3	0	1	1	0	3	0	0	0
50S ribosomal protein L19 OS=Escherichia coli (strain K12) GN=rplS PE=1 SV=2	P0A7K6	1	2	1	1	1	1	0	1	1	0	0	0	0	0	1	0	0	0
30S ribosomal protein S12 OS=Escherichia coli (strain K12) GN=rpsL PE=1 SV=2	P0A7S3	1	2	1	1	0	1	1	0	0	1	1	0	1	1	0	0	0	0
Ribose-5-phosphate isomerase A OS=Escherichia coli (strain K12) GN=rpiA PE=1 SV=1	P0A7Z0	0	0	1	1	1	1	0	1	0	0	0	0	1	0	1	0	0	0
NifU-like protein OS=Escherichia coli (strain K12) GN=nifU PE=1 SV=1	P0ACD4	0	1	1	1	1	1	0	1	1	0	1	0	0	0	0	0	0	0
Fe/S biogenesis protein NfuA OS=Escherichia coli (strain K12) GN=nfuA PE=1 SV=1	P63020	0	1	1	1	1	1	0	1	0	0	0	0	0	0	1	0	0	0
DNA-binding protein HU-alpha OS=Escherichia coli (strain K12) GN=hupA PE=1 SV=1	P0ACF0	0	0	1	0	2	1	0	1	1	0	0	0	1	0	1	0	0	0
Enamine/imine deaminase OS=Escherichia coli (strain K12) GN=ridA PE=1 SV=2	P0AF93	0	1	1	0	2	1	0	2	0	0	0	1	1	0	1	0	0	0
pep chain release factor 2 OS=Escherichia coli (strain K12) GN=prfB PE=1 SV=3 - [RF2_ECOLI]	P07012	0	4	1	3	4	0	0	1	0	0	0	0	0	0	1	0	0	0
Cysteine synthase A OS=Escherichia coli (strain K12) GN=cysK PE=1 SV=2	P0ABK5	0	2	1	3	4	0	0	2	1	0	2	0	0	0	1	0	0	0
Glyceraldehyde-3-phosphate dehydrogenase A OS=Escherichia coli (strain K12) GN=gapA PE=1 SV=2	P0A9B2	0	1	1	2	2	0	0	2	1	0	1	0	1	0	2	0	0	0
Aspartate--ammonia ligase OS=Escherichia coli (strain K12) GN=asnA PE=1 SV=1	P00963	0	1	1	1	3	0	0	2	4	1	2	1	1	0	1	0	0	1
Iron-sulfur cluster insertion protein ErpA OS=Escherichia coli (strain K12) GN=erpA PE=1 SV=1	P0ACC3	0	1	1	1	1	0	0	1	0	0	0	0	0	0	0	0	0	0
Bifunctional purine biosynthesis protein PurH OS=Escherichia coli (strain K12) GN=purH PE=1 SV=1	P15639	0	4	1	1	3	0	0	0	0	0	0	0	0	1	0	0	0	0
Phosphoribosylamine--glycine ligase OS=Escherichia coli (strain K12) GN=purD PE=1 SV=2	P15640	0	1	1	1	2	0	0	1	0	0	0	0	1	0	1	0	0	0
Protein YdgH OS=Escherichia coli (strain K12) GN=ydgH PE=1 SV=1	P76177	0	0	1	1	1	0	0	1	0	1	1	0	0	0	0	0	0	0
Probable deferrochelatase/peroxidase YfeX OS=Escherichia coli (strain K12) GN=yfeX PE=1 SV=2	P76536	0	0	1	1	0	0	0	1	0	0	1	0	1	0	0	0	0	0
Isocitrate dehydrogenase [NADP] OS=Escherichia coli (strain K12) GN=icd PE=1 SV=1	P08200	0	1	1	0	0	0	0	0	0	0	0	0	0	0	0	0	0	0
Probable GTP-binding protein EngB OS=Escherichia coli (strain K12) GN=engB PE=1 SV=1	P0A6P7	0	0	1	0	0	0	0	0	0	0	0	0	0	0	0	0	0	0
50S ribosomal protein L28 OS=Escherichia coli (strain K12) GN=rpmB PE=1 SV=2	P0A7M2	1	2	1	0	0	0	0	0	0	0	0	0	0	0	0	0	0	0
50S ribosomal protein L36 OS=Escherichia coli (strain K12) GN=rpmJ PE=1 SV=1	P0A7Q6	0	0	1	0	0	0	0	0	0	0	0	0	0	0	0	0	0	0
Transaldolase A OS=Escherichia coli (strain K12) GN=talA PE=1 SV=1	P0A867	0	0	1	0	1	0	0	0	0	0	0	0	0	0	0	0	0	0
Probable transcriptional regulatory protein YebC OS=Escherichia coli (strain K12) GN=yebC PE=1 SV=1	P0A8A0	0	2	1	0	0	0	0	0	0	0	0	0	0	0	0	0	0	0
Aldehyde-alcohol dehydrogenase OS=Escherichia coli (strain K12) GN=adhE PE=1 SV=2	P0A9Q7	0	0	1	0	0	0	0	0	0	1	1	0	0	0	0	0	0	0
Deoxyribose operon repressor OS=Escherichia coli (strain K12) GN=deoR PE=1 SV=1	P0ACK5	0	0	1	0	0	0	0	0	0	0	0	0	0	0	0	0	0	0
Ribosome modulation factor OS=Escherichia coli (strain K12) GN=rmf PE=1 SV=1	P0AFW2	0	0	1	0	0	0	0	0	0	0	0	0	0	0	0	0	0	0
30S ribosomal protein S17 OS=Escherichia coli (strain K12) GN=rpsQ PE=1 SV=2	P0AG63	0	0	1	0	2	0	0	0	0	0	0	0	0	0	0	0	0	1
tRNA (guanosine(18)-2'-O)-methyltransferase OS=Escherichia coli (strain K12) GN=trmH PE=1 SV=1	P0AGJ2	0	0	1	0	0	0	0	0	0	0	0	0	0	0	0	0	0	0
Phosphoadenosine phosphosulfate reductase OS=Escherichia coli (strain K12) GN=cysH PE=1 SV=3	P17854	0	0	1	0	0	0	0	0	0	0	0	0	0	0	0	0	0	0
Phosphoribosylglycinamide formyltransferase 2 OS=Escherichia coli (strain K12) GN=purT PE=1 SV=3	P33221	0	1	1	0	0	0	0	1	0	1	0	0	0	0	0	0	0	0
50S ribosomal protein L3 OS=Escherichia coli (strain K12) GN=rplC PE=1 SV=1	P60438	0	1	1	0	0	0	0	0	1	1	0	0	0	0	0	0	0	0
50S ribosomal protein L4 OS=Escherichia coli (strain K12) GN=rplD PE=1 SV=1	P60723	0	1	1	0	1	0	0	0	0	0	0	0	0	0	0	0	0	0
Chaperone protein DnaK OS=Escherichia coli (strain K12) GN=dnaK PE=1 SV=2	P0A6Y8	1	3	0	11	23	13	17	28	41	27	40	6	5	6	4	3	1	1
Trigger factor OS=Escherichia coli (strain K12) GN=tig PE=1 SV=1	P0A850	0	7	0	10	11	4	0	2	1	0	2	2	2	0	1	0	0	0
60 kDa chaperonin OS=Escherichia coli (strain K12) GN=groL PE=1 SV=2	P0A6F5	4	9	0	6	11	4	0	6	11	6	10	0	0	0	0	5	8	13
Soluble lytic murein transglycosylase OS=Escherichia coli (strain K12) GN=slt PE=1 SV=1 - [SLT_ECOLI]	P0AGC3	0	0	0	6	6	4	0	0	0	0	0	0	0	0	0	0	0	0
Uncharacterized protein YncE OS=Escherichia coli (strain K12) GN=yncE PE=1 SV=1 - [YNCE_ECOLI]	P76116	0	0	0	6	5	4	0	0	0	0	1	0	0	0	0	0	0	0
Chaperone protein skp OS=Escherichia coli (strain K12) GN=skp PE=1 SV=1 - [SKP_ECOLI]	P0AEU7	0	0	0	2	3	4	0	0	0	1	0	0	0	0	0	0	0	0
Bifunctional aspartokinase/homoserine dehydrogenase 1 OS=Escherichia coli (strain K12) GN=thrA PE=1 SV=2	P00561	0	1	0	5	7	3	1	1	3	4	6	0	0	0	0	1	2	1
Thiol:disulfide interchange protein DsbC OS=Escherichia coli (strain K12) GN=dsbC PE=1 SV=1 - [DSBC_ECOLI]	P0AEG6	0	0	0	5	5	3	0	0	0	0	0	0	0	0	0	0	0	0
Spheroplast protein Y OS=Escherichia coli (strain K12) GN=spy PE=1 SV=1 - [SPY_ECOLI]	P77754	0	0	0	4	5	3	0	0	0	0	0	0	0	0	0	0	0	0
Cysteine desulfurase OS=Escherichia coli (strain K12) GN=iscS PE=1 SV=1	P0A6B7	0	1	0	3	4	3	0	3	3	0	3	0	0	0	0	0	0	0
FKBP-type 22 kDa peptidyl-prolyl cis-trans isomerase OS=Escherichia coli (strain K12) GN=fklB PE=1 SV=2	P0A9L3	0	1	0	5	4	2	0	1	1	0	2	0	1	0	2	0	0	0
Transcription termination factor Rho OS=Escherichia coli (strain K12) GN=rho PE=1 SV=1	P0AG30	0	1	0	4	6	2	0	2	4	1	4	0	0	0	0	0	0	0
Glycyl-tRNA synthetase alpha subunit OS=Escherichia coli (strain K12) GN=glyQ PE=1 SV=2 - [SYGA_ECOLI]	P00960	0	0	0	3	6	2	0	2	2	2	1	0	0	0	0	0	2	3
Cell division protein FtsZ OS=Escherichia coli (strain K12) GN=ftsZ PE=1 SV=1 - [FTSZ_ECOLI]	P0A9A6	0	0	0	3	5	1	1	2	2	1	3	0	0	0	0	0	0	0
Osmotically-inducible protein Y OS=Escherichia coli (strain K12) GN=osmY PE=1 SV=1 - [OSMY_ECOLI]	P0AFH8	0	0	0	3	2	1	0	0	0	0	0	0	0	0	0	0	0	0
Proline--tRNA ligase OS=Escherichia coli (strain K12) GN=proS PE=1 SV=4	P16659	0	1	0	3	3	1	0	1	2	1	3	0	1	0	0	0	0	0
50S ribosomal protein L1 OS=Escherichia coli (strain K12) GN=rplA PE=1 SV=2	P0A7L0	1	0	0	2	1	1	0	1	0	1	2	0	1	0	0	0	1	0
30S ribosomal protein S2 OS=Escherichia coli (strain K12) GN=rpsB PE=1 SV=2	P0A7V0	0	2	0	2	4	1	0	1	3	0	3	0	0	0	0	0	0	0
Flavoprotein WrbA OS=Escherichia coli (strain K12) GN=wrbA PE=1 SV=2	P0A8G6	0	1	0	2	1	1	0	0	3	1	3	0	1	0	1	0	0	0
Septum site-determining protein MinD OS=Escherichia coli (strain K12) GN=minD PE=1 SV=2 - [MIND_ECOLI]	P0AEZ3	0	0	0	2	4	1	0	0	4	2	1	0	2	0	1	0	0	0
Uncharacterized ABC transporter ATP-binding protein YheS OS=Escherichia coli (strain K12) GN=yheS PE=1 SV=1 - [YHES_ECOLI]	P63389	0	0	0	2	1	1	0	0	2	0	4	0	0	0	0	0	0	0
Uncharacterized symporter ydjN OS=Escherichia coli (strain K12) GN=ydjN PE=3 SV=1 - [YDJN_ECOLI]	P77529	0	0	0	2	2	1	0	1	1	1	3	0	0	0	0	0	0	0
Protein grpE OS=Escherichia coli (strain K12) GN=grpE PE=1 SV=1 - [GRPE_ECOLI]	P09372	0	0	0	1	2	1	1	2	4	2	3	0	0	0	0	0	0	0
Outer membrane lipoprotein slyB OS=Escherichia coli (strain K12) GN=slyB PE=2 SV=1 - [SLYB_ECOLI]	P0A905	0	0	0	1	0	1	1	0	1	1	2	0	0	0	0	0	0	0
Outer membrane protein assembly factor yaeT OS=Escherichia coli (strain K12) GN=yaeT PE=1 SV=1 - [YAET_ECOLI]	P0A940	0	0	0	1	1	1	0	0	0	0	0	0	0	0	0	0	0	0
Transcriptional regulatory protein OmpR OS=Escherichia coli (strain K12) GN=ompR PE=1 SV=1 - [OMPR_ECOLI]	P0AA16	0	0	0	1	1	1	0	0	0	0	0	0	0	0	0	0	0	0
DNA-binding protein H-NS OS=Escherichia coli (strain K12) GN=hns PE=1 SV=2	P0ACF8	0	1	0	1	2	1	0	2	1	0	1	0	1	0	1	0	0	0
Glutamine transport ATP-binding protein GlnQ OS=Escherichia coli (strain K12) GN=glnQ PE=1 SV=1 - [GLNQ_ECOLI]	P10346	0	0	0	1	2	1	0	1	1	0	1	1	0	0	0	0	0	0
5-methyltetrahydropteroyltriglutamate--homocysteine methyltransferase OS=Escherichia coli (strain K12) GN=metE PE=1 SV=6 - [METE_ECOLI]	P25665	0	0	0	1	2	1	0	1	5	1	4	0	1	0	1	0	0	0
Oligopep transport ATP-binding protein OppF OS=Escherichia coli (strain K12) GN=oppF PE=3 SV=1 - [OPPF_ECOLI]	P77737	0	0	0	1	2	1	0	0	1	0	1	0	1	0	0	0	0	0
pep methionine sulfoxide reductase MsrA OS=Escherichia coli (strain K12) GN=msrA PE=1 SV=2 - [MSRA_ECOLI]	P0A744	0	0	0	0	1	1	0	0	0	0	0	0	0	0	0	0	0	0
Zinc resistance-associated protein OS=Escherichia coli (strain K12) GN=zraP PE=1 SV=1 - [ZRAP_ECOLI]	P0AAA9	0	0	0	0	0	1	0	0	0	0	0	0	0	0	0	0	0	0
Chaperone surA OS=Escherichia coli (strain K12) GN=surA PE=1 SV=1 - [SURA_ECOLI]	P0ABZ6	0	0	0	0	2	1	0	0	0	0	0	0	0	0	0	0	0	0
Leu/Ile/Val-binding protein OS=Escherichia coli (strain K12) GN=livJ PE=1 SV=1	P0AD96	0	1	0	0	0	1	0	0	0	0	0	0	0	0	0	0	0	0
Periplasmic oligopep-binding protein OS=Escherichia coli (strain K12) GN=oppA PE=1 SV=2 - [OPPA_ECOLI]	P23843	0	0	0	0	1	1	0	0	0	0	0	0	0	0	0	0	0	0
Glycine--tRNA ligase beta subunit OS=Escherichia coli (strain K12) GN=glyS PE=1 SV=4	P00961	0	2	0	4	4	0	0	1	1	1	2	0	0	0	0	0	0	0
4-hydroxy-3-methylbut-2-en-1-yl diphosphate synthase OS=Escherichia coli (strain K12) GN=ispG PE=1 SV=1 - [ISPG_ECOLI]	P62620	0	0	0	4	4	0	0	2	2	1	3	0	0	0	0	0	0	0
Rod shape-determining protein MreB OS=Escherichia coli (strain K12) GN=mreB PE=1 SV=1 - [MREB_ECOLI]	P0A9X4	0	0	0	3	5	0	0	0	3	1	4	0	0	0	0	0	0	0
ATP synthase subunit beta OS=Escherichia coli (strain K12) GN=atpD PE=1 SV=2 - [ATPB_ECOLI]	P0ABB4	0	0	0	3	7	0	0	1	5	4	2	0	0	0	0	0	0	0
Flagellar brake protein YcgR OS=Escherichia coli (strain K12) GN=ycgR PE=1 SV=1 - [YCGR_ECOLI]	P76010	0	0	0	3	3	0	0	0	4	0	4	0	0	0	0	0	0	0
Chaperone protein htpG OS=Escherichia coli (strain K12) GN=htpG PE=1 SV=1 - [HTPG_ECOLI]	P0A6Z3	0	0	0	2	2	0	1	5	6	3	7	0	0	0	0	0	0	0
G/U mismatch-specific DNA glycosylase OS=Escherichia coli (strain K12) GN=mug PE=1 SV=1 - [MUG_ECOLI]	P0A9H1	0	0	0	2	1	0	0	0	0	0	0	0	0	0	0	0	0	0
Phosphate acetyltransferase OS=Escherichia coli (strain K12) GN=pta PE=1 SV=2 - [PTA_ECOLI]	P0A9M8	0	0	0	2	2	0	0	2	3	3	3	0	0	0	0	0	0	0
Phosphate import ATP-binding protein PstB OS=Escherichia coli (strain K12) GN=pstB PE=1 SV=2 - [PSTB_ECOLI]	P0AAH0	0	0	0	2	1	0	0	0	1	0	0	0	0	0	0	0	0	0
DNA protection during starvation protein OS=Escherichia coli (strain K12) GN=dps PE=1 SV=2 - [DPS_ECOLI]	P0ABT2	0	0	0	2	1	0	0	1	0	0	0	0	0	0	0	0	0	0
Uncharacterized protein yeaG OS=Escherichia coli (strain K12) GN=yeaG PE=3 SV=1 - [YEAG_ECOLI]	P0ACY3	0	0	0	2	2	0	0	0	0	0	2	0	0	0	0	0	0	0
DNA replication terminus site-binding protein OS=Escherichia coli (strain K12) GN=tus PE=1 SV=1 - [TUS_ECOLI]	P16525	0	0	0	2	1	0	0	0	0	0	0	0	0	0	0	0	0	0
Phosphoenolpyruvate synthase OS=Escherichia coli (strain K12) GN=ppsA PE=1 SV=5 - [PPSA_ECOLI]	P23538	0	0	0	2	4	0	0	1	2	1	3	0	0	0	0	0	0	0
Glutamate-1-semialdehyde 2,1-aminomutase OS=Escherichia coli (strain K12) GN=hemL PE=1 SV=2 - [GSA_ECOLI]	P23893	0	0	0	2	3	0	0	1	0	0	0	0	0	0	0	0	0	0
[Protein-PII] uridylyltransferase OS=Escherichia coli (strain K12) GN=glnD PE=3 SV=2 - [GLND_ECOLI]	P27249	0	0	0	2	2	0	0	0	0	1	1	0	0	0	0	0	0	0
Oligopep transport ATP-binding protein OppD OS=Escherichia coli (strain K12) GN=oppD PE=3 SV=2 - [OPPD_ECOLI]	P76027	0	0	0	2	4	0	0	1	2	0	2	0	0	0	0	0	0	0
Aspartate aminotransferase OS=Escherichia coli (strain K12) GN=aspC PE=1 SV=1	P00509	0	2	0	1	1	0	0	1	0	0	0	0	0	0	0	0	0	0
Bifunctional aspartokinase/homoserine dehydrogenase 2 OS=Escherichia coli (strain K12) GN=metL PE=1 SV=3 - [AK2H_ECOLI]	P00562	0	0	0	1	1	0	0	1	3	0	1	0	0	0	0	0	0	0
Phosphoenolpyruvate carboxylase OS=Escherichia coli (strain K12) GN=ppc PE=1 SV=1 - [CAPP_ECOLI]	P00864	0	0	0	1	0	0	0	1	0	0	1	0	0	0	0	0	0	0
Anthranilate synthase component 1 OS=Escherichia coli (strain K12) GN=trpE PE=1 SV=2 - [TRPE_ECOLI]	P00895	0	0	0	1	3	0	0	0	5	0	0	0	0	0	0	0	0	0
Tryptophan--tRNA ligase OS=Escherichia coli (strain K12) GN=trpS PE=1 SV=3	P00954	0	1	0	1	1	0	0	1	0	0	1	0	1	0	0	0	0	0
Isoleucyl-tRNA synthetase OS=Escherichia coli (strain K12) GN=ileS PE=1 SV=5 - [SYI_ECOLI]	P00956	0	0	0	1	0	0	0	0	0	0	0	0	0	0	0	0	0	0
Alanyl-tRNA synthetase OS=Escherichia coli (strain K12) GN=alaS PE=1 SV=2 - [SYA_ECOLI]	P00957	0	0	0	1	1	0	0	1	1	0	1	0	0	0	0	0	0	0
Protein tonB OS=Escherichia coli (strain K12) GN=tonB PE=1 SV=2 - [TONB_ECOLI]	P02929	0	0	0	1	0	0	0	0	0	0	0	0	0	0	0	0	0	0
Glutamate--tRNA ligase OS=Escherichia coli (strain K12) GN=gltX PE=1 SV=1	P04805	0	1	0	1	0	0	0	0	0	0	0	0	0	0	0	0	0	0
Probable tRNA threonylcarbamoyladenosine biosynthesis protein Gcp OS=Escherichia coli (strain K12) GN=gcp PE=1 SV=2 - [GCP_ECOLI]	P05852	0	0	0	1	0	0	0	0	0	0	0	0	0	0	0	0	0	0
Succinate dehydrogenase iron-sulfur subunit OS=Escherichia coli (strain K12) GN=sdhB PE=1 SV=1 - [DHSB_ECOLI]	P07014	0	0	0	1	1	0	0	1	0	0	0	0	0	0	0	0	0	0
Phosphoribosylformylglycinamidine cyclo-ligase OS=Escherichia coli (strain K12) GN=purM PE=1 SV=3	P08178	0	1	0	1	2	0	0	0	1	0	0	0	0	0	0	0	0	0
Chaperone protein DnaJ OS=Escherichia coli (strain K12) GN=dnaJ PE=1 SV=3 - [DNAJ_ECOLI]	P08622	0	0	0	1	1	0	0	3	6	4	6	0	0	0	0	0	0	0
Glycerol kinase OS=Escherichia coli (strain K12) GN=glpK PE=1 SV=2 - [GLPK_ECOLI]	P0A6F3	0	0	0	1	0	0	0	0	0	0	2	0	0	0	0	0	0	0
10 kDa chaperonin OS=Escherichia coli (strain K12) GN=groS PE=1 SV=1	P0A6F9	0	2	0	1	0	0	0	1	0	0	1	0	1	0	2	0	0	1
ATP-dependent Clp protease ATP-binding subunit ClpX OS=Escherichia coli (strain K12) GN=clpX PE=1 SV=2 - [CLPX_ECOLI]	P0A6H1	0	0	0	1	2	0	0	0	2	1	5	0	0	0	0	0	0	0
D-amino acid dehydrogenase small subunit OS=Escherichia coli (strain K12) GN=dadA PE=2 SV=1 - [DADA_ECOLI]	P0A6J5	0	0	0	1	0	0	0	0	0	0	0	0	0	0	0	0	0	0
3-hydroxydecanoyl-[acyl-carrier-protein] dehydratase OS=Escherichia coli (strain K12) GN=fabA PE=1 SV=2	P0A6Q3	0	1	0	1	0	0	0	0	0	0	0	0	0	0	0	0	0	0
Translation initiation factor IF-3 OS=Escherichia coli (strain K12) GN=infC PE=1 SV=1 - [IF3_ECOLI]	P0A707	0	0	0	1	1	0	0	1	1	0	1	0	1	0	1	0	0	1
Ribose-phosphate pyrophosphokinase OS=Escherichia coli (strain K12) GN=prs PE=1 SV=2	P0A717	0	1	0	1	1	0	0	0	0	0	1	0	0	0	0	0	0	0
pep methionine sulfoxide reductase MsrB OS=Escherichia coli (strain K12) GN=msrB PE=1 SV=1 - [MSRB_ECOLI]	P0A746	0	2	0	1	0	0	0	1	0	0	0	0	0	0	0	0	0	0
UDP-N-acetylglucosamine 1-carboxyvinyltransferase OS=Escherichia coli (strain K12) GN=murA PE=1 SV=1 - [MURA_ECOLI]	P0A749	0	0	0	1	1	0	0	0	0	0	1	0	0	0	0	0	0	0
Probable phosphoglycerate mutase gpmB OS=Escherichia coli (strain K12) GN=gpmB PE=3 SV=1 - [GPMB_ECOLI]	P0A7A2	0	0	0	1	1	0	0	0	0	0	0	0	0	0	0	0	0	0
Phosphoribosylaminoimidazole-succinocarboxamide synthase OS=Escherichia coli (strain K12) GN=purC PE=1 SV=1	P0A7D7	0	1	0	1	5	0	0	1	1	0	1	0	0	0	0	0	0	0
50S ribosomal protein L11 OS=Escherichia coli (strain K12) GN=rplK PE=1 SV=2 - [RL11_ECOLI]	P0A7J7	0	0	0	1	0	0	0	1	0	0	1	0	0	0	1	0	0	0
50S ribosomal protein L7/L12 OS=Escherichia coli (strain K12) GN=rplL PE=1 SV=2	P0A7K2	0	1	0	1	1	0	0	1	0	1	1	1	1	0	0	0	1	1
DNA-directed RNA polymerase subunit alpha OS=Escherichia coli (strain K12) GN=rpoA PE=1 SV=1 - [RPOA_ECOLI]	P0A7Z4	0	0	0	1	0	0	0	2	2	1	1	0	0	0	0	0	0	0
S-adenosylmethionine synthase OS=Escherichia coli (strain K12) GN=metK PE=1 SV=2	P0A817	0	1	0	1	5	0	0	2	2	0	4	0	0	0	0	0	0	0
Protein tolB OS=Escherichia coli (strain K12) GN=tolB PE=1 SV=1 - [TOLB_ECOLI]	P0A855	0	0	0	1	1	0	0	0	0	0	0	0	0	0	0	0	0	0
Ubiquinone/menaquinone biosynthesis methyltransferase ubiE OS=Escherichia coli (strain K12) GN=ubiE PE=1 SV=1 - [UBIE_ECOLI]	P0A887	0	0	0	1	1	0	0	0	0	0	0	0	0	0	0	0	0	0
Threonyl-tRNA synthetase OS=Escherichia coli (strain K12) GN=thrS PE=1 SV=1 - [SYT_ECOLI]	P0A8M3	0	0	0	1	0	0	0	1	0	1	1	0	0	0	0	0	0	0
Lysyl-tRNA synthetase OS=Escherichia coli (strain K12) GN=lysS PE=1 SV=2 - [SYK1_ECOLI]	P0A8N3	0	0	0	1	0	0	0	0	0	0	0	0	0	0	0	0	0	0
Outer membrane protein A OS=Escherichia coli (strain K12) GN=ompA PE=1 SV=1 - [OMPA_ECOLI]	P0A910	0	0	0	1	0	0	0	0	0	0	0	0	0	0	0	0	0	0
2,3,4,5-tetrahydropyridine-2,6-dicarboxylate N-succinyltransferase OS=Escherichia coli (strain K12) GN=dapD PE=1 SV=1 - [DAPD_ECOLI]	P0A9D8	0	1	0	1	4	0	0	2	0	0	0	0	2	0	1	0	0	0
FKBP-type peptidyl-prolyl cis-trans isomerase slyD OS=Escherichia coli (strain K12) GN=slyD PE=1 SV=1 - [SLYD_ECOLI]	P0A9K9	0	0	0	1	1	0	0	0	0	0	0	0	0	0	1	0	0	0
Peptidyl-prolyl cis-trans isomerase C OS=Escherichia coli (strain K12) GN=ppiC PE=1 SV=2 - [PPIC_ECOLI]	P0A9L5	0	0	0	1	0	0	0	0	0	0	0	0	0	0	0	0	0	0
Dihydrolipoyl dehydrogenase OS=Escherichia coli (strain K12) GN=lpdA PE=1 SV=2 - [DLDH_ECOLI]	P0A9P0	0	0	0	1	2	0	0	1	1	0	1	0	0	0	0	0	0	0
Aerobic respiration control protein ArcA OS=Escherichia coli (strain K12) GN=arcA PE=1 SV=1 - [ARCA_ECOLI]	P0A9Q1	0	0	0	1	2	0	0	0	0	0	0	0	0	0	0	0	0	0
Lipopolysaccharide export system ATP-binding protein LptB OS=Escherichia coli (strain K12) GN=lptB PE=1 SV=2 - [LPTB_ECOLI]	P0A9V1	0	0	0	1	2	0	0	0	1	0	0	0	0	0	0	0	0	0
D-serine/D-alanine/glycine transporter OS=Escherichia coli (strain K12) GN=cycA PE=1 SV=1 - [CYCA_ECOLI]	P0AAE0	0	0	0	1	1	0	0	0	1	1	1	0	0	0	0	0	0	0
pep transport system ATP-binding protein SapF OS=Escherichia coli (strain K12) GN=sapF PE=3 SV=1 - [SAPF_ECOLI]	P0AAH8	0	0	0	1	2	0	0	0	0	0	0	0	0	0	0	0	0	0
ATP synthase subunit alpha OS=Escherichia coli (strain K12) GN=atpA PE=1 SV=1	P0ABB0	0	1	0	1	1	0	0	1	1	1	1	0	0	0	1	0	0	0
ATP-dependent Clp protease ATP-binding subunit ClpA OS=Escherichia coli (strain K12) GN=clpA PE=1 SV=1 - [CLPA_ECOLI]	P0ABH9	0	0	0	1	0	0	0	0	1	0	1	0	0	0	0	0	0	0
Succinate dehydrogenase flavoprotein subunit OS=Escherichia coli (strain K12) GN=sdhA PE=1 SV=1	P0AC41	0	1	0	1	1	0	0	1	0	0	0	0	0	0	0	0	0	0
Bifunctional protein GlmU OS=Escherichia coli (strain K12) GN=glmU PE=1 SV=1 - [GLMU_ECOLI]	P0ACC7	0	0	0	1	0	0	0	1	0	0	0	0	0	0	0	0	0	0
DNA-binding protein HU-beta OS=Escherichia coli (strain K12) GN=hupB PE=1 SV=1 - [DBHB_ECOLI]	P0ACF4	0	0	0	1	0	0	0	1	0	0	1	0	1	0	0	0	0	0
Inositol-1-monophosphatase OS=Escherichia coli (strain K12) GN=suhB PE=1 SV=1	P0ADG4	0	2	0	1	2	0	0	1	0	0	0	0	0	0	0	0	0	0
Inosine-5'-monophosphate dehydrogenase OS=Escherichia coli (strain K12) GN=guaB PE=1 SV=1 - [IMDH_ECOLI]	P0ADG7	0	0	0	1	0	0	0	1	0	0	1	0	0	0	0	0	0	0
Cell division protein ZapA OS=Escherichia coli (strain K12) GN=zapA PE=1 SV=1 - [ZAPA_ECOLI]	P0ADS2	0	0	0	1	1	0	0	0	0	0	0	0	0	0	0	0	0	0
30S ribosomal protein S15 OS=Escherichia coli (strain K12) GN=rpsO PE=1 SV=2	P0ADZ4	0	1	0	1	1	0	0	0	0	0	1	0	1	0	1	0	0	0
Alkyl hydroperoxide reductase subunit C OS=Escherichia coli (strain K12) GN=ahpC PE=1 SV=2	P0AE08	0	3	0	1	1	0	0	2	0	0	2	0	0	0	1	0	0	0
Periplasmic protein CpxP OS=Escherichia coli (strain K12) GN=cpxP PE=1 SV=1 - [CPXP_ECOLI]	P0AE85	0	0	0	1	1	0	0	0	0	0	0	0	0	0	0	0	0	0
Response regulator uvrY OS=Escherichia coli (strain K12) GN=uvrY PE=1 SV=1 - [UVRY_ECOLI]	P0AED5	0	0	0	1	1	0	0	0	1	0	0	0	0	0	0	0	0	0
3-oxoacyl-[acyl-carrier-protein] reductase FabG OS=Escherichia coli (strain K12) GN=fabG PE=1 SV=1	P0AEK2	0	1	0	1	3	0	0	1	0	0	0	0	0	0	2	0	0	0
DNA gyrase subunit A OS=Escherichia coli (strain K12) GN=gyrA PE=1 SV=1 - [GYRA_ECOLI]	P0AES4	0	0	0	1	0	0	0	0	0	0	1	0	0	0	0	0	0	0
5'-methylthioadenosine/S-adenosylhomocysteine nucleosidase OS=Escherichia coli (strain K12) GN=mtnN PE=1 SV=1 - [MTNN_ECOLI]	P0AF12	0	0	0	1	1	0	0	0	0	0	0	0	0	0	0	0	0	0
Nitrate/nitrite response regulator protein NarL OS=Escherichia coli (strain K12) GN=narL PE=1 SV=1	P0AF28	0	1	0	1	0	0	0	0	0	0	0	0	0	0	0	0	0	0
50S ribosomal protein L30 OS=Escherichia coli (strain K12) GN=rpmD PE=1 SV=2 - [RL30_ECOLI]	P0AG51	0	0	0	1	0	0	0	0	0	0	1	0	0	0	0	0	0	0
Tyrosyl-tRNA synthetase OS=Escherichia coli (strain K12) GN=tyrS PE=1 SV=2 - [SYY_ECOLI]	P0AGJ9	0	0	0	1	1	0	0	0	1	0	0	0	0	0	0	0	0	0
Protein translocase subunit SecA OS=Escherichia coli (strain K12) GN=secA PE=1 SV=2 - [SECA_ECOLI]	P10408	0	0	0	1	0	0	0	0	0	0	0	0	0	0	0	0	0	0
Helicase IV OS=Escherichia coli (strain K12) GN=helD PE=1 SV=2 - [HELD_ECOLI]	P15038	0	0	0	1	1	0	0	0	0	1	0	0	0	0	0	0	0	0
tRNA dimethylallyltransferase OS=Escherichia coli (strain K12) GN=miaA PE=1 SV=2 - [MIAA_ECOLI]	P16384	0	0	0	1	1	0	0	1	0	0	0	0	0	0	0	0	0	0
Glucosamine--fructose-6-phosphate aminotransferase [isomerizing] OS=Escherichia coli (strain K12) GN=glmS PE=1 SV=4 - [GLMS_ECOLI]	P17169	0	0	0	1	2	0	0	1	2	0	1	0	0	0	0	0	0	0
Cysteinyl-tRNA synthetase OS=Escherichia coli (strain K12) GN=cysS PE=1 SV=2 - [SYC_ECOLI]	P21888	0	0	0	1	0	0	0	0	0	0	0	0	1	0	1	0	0	0
Glutamate racemase OS=Escherichia coli (strain K12) GN=murI PE=1 SV=2 - [MURI_ECOLI]	P22634	0	0	0	1	1	0	0	0	0	0	0	0	0	0	0	0	0	0
Ferrochelatase OS=Escherichia coli (strain K12) GN=hemH PE=1 SV=3 - [HEMH_ECOLI]	P23871	0	0	0	1	0	0	0	0	0	0	0	0	0	0	0	0	0	0
Bifunctional protein FolD OS=Escherichia coli (strain K12) GN=folD PE=1 SV=4 - [FOLD_ECOLI]	P24186	0	0	0	1	1	0	0	0	0	0	0	0	0	0	0	0	0	0
D-alanyl-D-alanine carboxypeptidase dacB OS=Escherichia coli (strain K12) GN=dacB PE=1 SV=2 - [DACB_ECOLI]	P24228	0	0	0	1	0	0	0	0	0	0	0	0	0	0	0	0	0	0
2-octaprenyl-6-methoxyphenol hydroxylase OS=Escherichia coli (strain K12) GN=ubiH PE=1 SV=2 - [UBIH_ECOLI]	P25534	0	0	0	1	1	0	0	0	0	0	0	0	0	0	0	0	0	0
High frequency lysogenization protein HflD OS=Escherichia coli (strain K12) GN=hflD PE=1 SV=1 - [HFLD_ECOLI]	P25746	0	0	0	1	1	0	0	0	0	0	0	0	0	0	0	0	0	0
Lipopolysaccharide biosynthesis protein rffA OS=Escherichia coli (strain K12) GN=rffA PE=3 SV=2 - [RFFA_ECOLI]	P27833	0	0	0	1	0	0	0	0	0	0	0	0	0	0	0	0	0	0
Chaperone protein hchA OS=Escherichia coli (strain K12) GN=hchA PE=1 SV=3 - [HCHA_ECOLI]	P31658	0	0	0	1	1	0	0	0	0	0	0	0	0	0	0	0	0	0
Uncharacterized lipoprotein yehR OS=Escherichia coli (strain K12) GN=yehR PE=1 SV=2 - [YEHR_ECOLI]	P33354	0	0	0	1	0	0	0	0	0	0	0	0	0	0	0	0	0	0
Uncharacterized protein yejA OS=Escherichia coli (strain K12) GN=yejA PE=4 SV=3 - [YEJA_ECOLI]	P33913	0	0	0	1	0	0	0	0	0	0	0	0	0	0	0	0	0	0
Aconitate hydratase 2 OS=Escherichia coli (strain K12) GN=acnB PE=1 SV=3	P36683	0	4	0	1	3	0	0	1	0	1	1	0	1	0	1	0	0	0
Uncharacterized ABC transporter ATP-binding protein YadG OS=Escherichia coli (strain K12) GN=yadG PE=3 SV=1 - [YADG_ECOLI]	P36879	0	0	0	1	1	0	0	0	0	0	1	0	0	0	0	0	0	0
Oxygen-insensitive NAD(P)H nitroreductase OS=Escherichia coli (strain K12) GN=nfnB PE=1 SV=1	P38489	0	1	0	1	2	0	0	1	0	0	0	0	0	0	1	0	0	0
Universal stress protein G OS=Escherichia coli (strain K12) GN=uspG PE=1 SV=2 - [USPG_ECOLI]	P39177	0	0	0	1	1	0	0	0	0	0	1	0	0	0	0	0	0	0
Uncharacterized protein yfeH OS=Escherichia coli (strain K12) GN=yfeH PE=4 SV=2 - [YFEH_ECOLI]	P39836	0	0	0	1	0	0	0	0	0	0	0	0	0	0	0	0	0	0
S-ribosylhomocysteine lyase OS=Escherichia coli (strain K12) GN=luxS PE=1 SV=3 - [LUXS_ECOLI]	P45578	0	0	0	1	1	0	0	0	1	0	0	0	0	0	0	0	0	0
p-hydroxybenzoic acid efflux pump subunit AaeA OS=Escherichia coli (strain K12) GN=aaeA PE=2 SV=1 - [AAEA_ECOLI]	P46482	0	0	0	1	0	0	0	0	0	0	0	0	0	0	0	0	0	0
6-phosphogluconolactonase OS=Escherichia coli (strain K12) GN=pgl PE=1 SV=2	P52697	0	1	0	1	0	0	0	0	0	0	0	0	0	0	0	0	0	0
Putative uncharacterized protein yifN OS=Escherichia coli (strain K12) GN=yifN PE=5 SV=1 - [YIFN_ECOLI]	P56259	0	0	0	1	0	0	0	0	0	0	0	0	0	0	0	0	0	0
Elongation factor 4 OS=Escherichia coli (strain K12) GN=lepA PE=1 SV=1 - [LEPA_ECOLI]	P60785	0	0	0	1	2	0	0	2	1	0	2	0	0	0	0	0	0	0
50S ribosomal protein L22 OS=Escherichia coli (strain K12) GN=rplV PE=1 SV=1	P61175	2	3	0	1	0	0	0	0	0	0	0	0	0	0	0	0	0	0
Autonomous glycyl radical cofactor OS=Escherichia coli (strain K12) GN=grcA PE=1 SV=1 - [GRCA_ECOLI]	P68066	0	0	0	1	2	0	0	2	1	0	4	0	0	0	0	0	0	0
Uncharacterized zinc-type alcohol dehydrogenase-like protein YahK OS=Escherichia coli (strain K12) GN=yahK PE=1 SV=1 - [YAHK_ECOLI]	P75691	0	0	0	1	1	0	0	0	0	0	0	0	0	0	1	0	0	0
Lipoprotein-releasing system ATP-binding protein LolD OS=Escherichia coli (strain K12) GN=lolD PE=1 SV=2 - [LOLD_ECOLI]	P75957	0	0	0	1	2	0	0	0	0	0	0	0	0	0	0	0	0	0
Lipoprotein yfgL OS=Escherichia coli (strain K12) GN=yfgL PE=1 SV=1 - [YFGL_ECOLI]	P77774	0	0	0	1	1	0	0	0	0	0	0	0	0	0	0	0	0	0
Uncharacterized GST-like protein yghU OS=Escherichia coli (strain K12) GN=yghU PE=1 SV=2 - [YGHU_ECOLI]	Q46845	0	0	0	1	0	0	0	0	0	0	0	0	0	0	0	0	0	0
6-phosphogluconate dehydrogenase, decarboxylating OS=Escherichia coli (strain K12) GN=gnd PE=1 SV=2 - [6PGD_ECOLI]	P00350	0	3	0	0	1	0	0	1	0	0	0	0	0	0	1	0	0	0
NADH dehydrogenase OS=Escherichia coli (strain K12) GN=ndh PE=1 SV=2 - [DHNA_ECOLI]	P00393	0	0	0	0	3	0	0	0	0	0	0	0	0	0	0	0	0	0
Isoform Alpha' of Ribonucleoside-diphosphate reductase 1 subunit alpha OS=Escherichia coli (strain K12) GN=nrdA - [RIR1_ECOLI]	P00452	0	0	0	0	1	0	0	0	0	0	0	0	0	0	0	0	0	0
Isoform Alpha' of Ribonucleoside-diphosphate reductase 1 subunit alpha OS=Escherichia coli (strain K12) GN=nrdA - [RIR1_ECOLI]	P00452-2	0	0	0	0	1	0	0	0	0	0	0	0	0	0	0	0	0	1
Tryptophan biosynthesis protein TrpCF OS=Escherichia coli (strain K12) GN=trpC PE=1 SV=3	P00909	0	1	0	0	4	0	0	0	0	0	0	0	0	0	0	0	0	0
Threonine synthase OS=Escherichia coli (strain K12) GN=thrC PE=1 SV=1 - [THRC_ECOLI]	P00934	0	0	0	0	0	0	0	0	0	1	0	0	0	0	0	0	0	0
Methionyl-tRNA synthetase OS=Escherichia coli (strain K12) GN=metG PE=1 SV=2 - [SYM_ECOLI]	P00959	0	0	0	0	0	0	0	1	0	0	1	0	0	0	0	0	0	0
Carbamoyl-phosphate synthase large chain OS=Escherichia coli (strain K12) GN=carB PE=1 SV=2	P00968	0	2	0	0	0	0	0	1	5	4	0	0	0	0	0	0	0	0
Outer membrane protein TolC OS=Escherichia coli (strain K12) GN=tolC PE=1 SV=3	P02930	1	0	0	0	0	0	0	1	3	0	2	0	0	0	0	0	0	0
GMP synthase [glutamine-hydrolyzing] OS=Escherichia coli (strain K12) GN=guaA PE=1 SV=1 - [GUAA_ECOLI]	P04079	0	0	0	0	2	0	0	0	0	0	0	0	0	0	0	0	0	0
Flagellin OS=Escherichia coli (strain K12) GN=fliC PE=1 SV=2 - [FLIC_ECOLI]	P04949	0	0	0	0	0	0	1	6	2	0	2	0	0	0	0	0	0	0
3-deoxy-manno-octulosonate cytidylyltransferase OS=Escherichia coli (strain K12) GN=kdsB PE=1 SV=2	P04951	0	1	0	0	0	0	0	0	0	0	0	0	0	0	0	0	0	0
Polyribonucleotide nucleotidyltransferase OS=Escherichia coli (strain K12) GN=pnp PE=1 SV=3 - [PNP_ECOLI]	P05055	0	0	0	0	0	0	0	3	0	0	0	0	0	0	0	0	0	0
Dihydrolipoyllysine-residue acetyltransferase component of pyruvate dehydrogenase complex OS=Escherichia coli (strain K12) GN=aceF PE=1 SV=3 - [ODP2_ECOLI]	P06959	0	0	0	0	0	0	0	2	1	0	1	0	0	0	0	0	0	2
Deoxyuridine 5'-triphosphate nucleotidohydrolase OS=Escherichia coli (strain K12) GN=dut PE=1 SV=1	P06968	0	0	0	0	1	0	0	0	0	0	0	0	0	0	0	0	0	0
Histidine biosynthesis bifunctional protein HisB OS=Escherichia coli (strain K12) GN=hisB PE=1 SV=1	P06987	0	2	0	0	1	0	0	0	0	0	2	1	1	1	1	0	0	0
HTH-type transcriptional regulator malT OS=Escherichia coli (strain K12) GN=malT PE=1 SV=2 - [MALT_ECOLI]	P06993	0	0	0	0	0	0	0	1	0	0	1	0	0	0	0	0	0	0
Methyl-accepting chemotaxis protein II OS=Escherichia coli (strain K12) GN=tar PE=1 SV=2 - [MCP2_ECOLI]	P07017	0	0	0	0	0	0	0	2	3	7	7	0	0	0	0	0	0	0
Histidine transport ATP-binding protein HisP OS=Escherichia coli (strain K12) GN=hisP PE=1 SV=2 - [HISP_ECOLI]	P07109	0	0	0	0	0	0	0	0	0	0	0	0	0	0	0	0	0	0
Valine--tRNA ligase OS=Escherichia coli (strain K12) GN=valS PE=1 SV=2	P07118	0	1	0	0	0	0	0	1	0	0	0	0	0	0	0	0	0	0
3-dehydroquinate synthase OS=Escherichia coli (strain K12) GN=aroB PE=3 SV=1 - [AROB_ECOLI]	P07639	0	0	0	0	1	0	0	0	0	0	0	0	0	0	0	0	0	0
Thymidine phosphorylase OS=Escherichia coli (strain K12) GN=deoA PE=1 SV=3	P07650	0	0	0	0	1	0	0	0	0	0	0	0	0	0	0	0	0	0
Bifunctional protein folC OS=Escherichia coli (strain K12) GN=folC PE=1 SV=2	P08192	0	0	0	0	1	0	0	0	0	0	0	0	0	0	0	0	0	0
Phenylalanyl-tRNA synthetase alpha chain OS=Escherichia coli (strain K12) GN=pheS PE=1 SV=2 - [SYFA_ECOLI]	P08312	0	0	0	0	0	0	0	1	1	0	1	0	0	0	0	0	0	0
USG-1 protein OS=Escherichia coli (strain K12) GN=usg PE=1 SV=1	P08390	0	1	0	0	0	0	0	0	0	0	0	0	0	0	0	0	0	0
Type I restriction enzyme EcoKI R protein OS=Escherichia coli (strain K12) GN=hsdR PE=3 SV=3 - [T1RK_ECOLI]	P08956	0	0	0	0	0	0	0	0	0	0	0	0	1	0	0	0	0	0
Type I restriction enzyme EcoKI M protein OS=Escherichia coli (strain K12) GN=hsdM PE=1 SV=1	P08957	0	0	0	0	1	0	0	0	0	0	0	0	0	0	0	0	0	0
Putative uroporphyrinogen-III C-methyltransferase OS=Escherichia coli (strain K12) GN=hemX PE=1 SV=1 - [HEMX_ECOLI]	P09127	0	0	0	0	0	0	0	0	0	0	0	0	0	0	0	0	0	1
Formate acetyltransferase 1 OS=Escherichia coli (strain K12) GN=pflB PE=1 SV=2	P09373	0	1	0	0	0	0	0	0	0	0	0	0	0	0	0	0	0	0
Glutamate synthase [NADPH] small chain OS=Escherichia coli (strain K12) GN=gltD PE=1 SV=3 - [GLTD_ECOLI]	P09832	0	0	0	0	0	0	0	0	0	1	0	0	0	0	0	0	0	0
UvrABC system protein A OS=Escherichia coli (strain K12) GN=uvrA PE=1 SV=1	P0A698	0	0	0	0	0	0	0	0	1	0	0	0	0	0	0	0	0	0
Acyl carrier protein OS=Escherichia coli (strain K12) GN=acpP PE=1 SV=2	P0A6A8	0	1	0	0	1	0	0	0	0	0	0	0	0	0	0	0	0	0
Amino-acid acetyltransferase OS=Escherichia coli (strain K12) GN=argA PE=1 SV=1 - [ARGA_ECOLI]	P0A6C5	0	0	0	0	0	0	0	2	1	0	1	0	0	0	0	0	0	1
Shikimate kinase 1 OS=Escherichia coli (strain K12) GN=aroK PE=1 SV=2 - [AROK_ECOLI]	P0A6D7	0	0	0	0	0	0	0	1	0	0	0	0	0	0	0	0	0	0
Argininosuccinate synthase OS=Escherichia coli (strain K12) GN=argG PE=1 SV=2	P0A6E4	0	2	0	0	0	0	1	4	5	4	6	0	0	0	0	0	0	0
Carbamoyl-phosphate synthase small chain OS=Escherichia coli (strain K12) GN=carA PE=1 SV=1 - [CARA_ECOLI]	P0A6F1	0	0	0	0	0	0	0	0	0	2	0	0	0	0	0	0	0	0
ATP-dependent Clp protease proteolytic subunit OS=Escherichia coli (strain K12) GN=clpP PE=1 SV=1 - [CLPP_ECOLI]	P0A6G7	0	0	0	0	0	0	0	0	0	0	1	0	0	0	0	0	0	0
ATP-dependent protease ATPase subunit HslU OS=Escherichia coli (strain K12) GN=hslU PE=1 SV=1 - [HSLU_ECOLI]	P0A6H5	0	0	0	0	0	0	0	1	1	2	1	0	0	0	0	0	0	0
Pantothenate kinase OS=Escherichia coli (strain K12) GN=coaA PE=1 SV=1 - [COAA_ECOLI]	P0A6I3	0	0	0	0	0	0	0	0	0	1	0	0	0	0	0	0	0	0
Phosphopentomutase OS=Escherichia coli (strain K12) GN=deoB PE=1 SV=1	P0A6K6	0	0	0	0	1	0	0	0	0	0	0	0	0	0	0	0	0	0
Elongation factor P OS=Escherichia coli (strain K12) GN=efp PE=1 SV=2	P0A6N4	0	0	0	0	1	0	0	0	0	0	0	0	0	0	0	0	0	0
Elongation factor Ts OS=Escherichia coli (strain K12) GN=tsf PE=1 SV=2	P0A6P1	0	2	0	0	1	0	0	1	0	0	0	0	2	0	4	0	0	0
GTPase Der OS=Escherichia coli (strain K12) GN=der PE=1 SV=1 - [DER_ECOLI]	P0A6P5	0	0	0	0	0	0	0	0	0	0	0	0	0	0	0	0	0	0
Glucokinase OS=Escherichia coli (strain K12) GN=glk PE=1 SV=1 - [GLK_ECOLI]	P0A6V8	0	0	0	0	0	0	0	0	0	0	0	0	0	0	0	0	0	0
Integration host factor subunit alpha OS=Escherichia coli (strain K12) GN=ihfA PE=1 SV=1 - [IHFA_ECOLI]	P0A6X7	0	0	0	0	0	0	0	0	0	0	0	0	1	0	1	0	0	1
Integration host factor subunit beta OS=Escherichia coli (strain K12) GN=ihfB PE=1 SV=1 - [IHFB_ECOLI]	P0A6Y1	0	0	0	0	0	0	0	0	0	0	0	0	0	0	0	0	0	0
33 kDa chaperonin OS=Escherichia coli (strain K12) GN=hslO PE=1 SV=1	P0A6Y5	0	1	0	0	0	0	0	0	0	0	0	0	0	0	0	0	0	0
Chaperone protein hscA OS=Escherichia coli (strain K12) GN=hscA PE=1 SV=1 - [HSCA_ECOLI]	P0A6Z1	0	0	0	0	1	0	0	0	0	0	0	0	0	0	0	0	0	0
Cell division topological specificity factor OS=Escherichia coli (strain K12) GN=minE PE=1 SV=1 - [MINE_ECOLI]	P0A734	0	0	0	0	1	0	0	0	1	0	0	0	0	0	0	0	0	0
Nucleoside diphosphate kinase OS=Escherichia coli (strain K12) GN=ndk PE=1 SV=2	P0A763	0	1	0	0	0	0	0	1	0	0	0	0	1	0	0	0	0	0
Pyridoxine 5'-phosphate synthase OS=Escherichia coli (strain K12) GN=pdxJ PE=1 SV=2	P0A794	0	1	0	0	0	0	0	0	0	0	0	0	0	0	0	0	0	0
6-phosphofructokinase isozyme 1 OS=Escherichia coli (strain K12) GN=pfkA PE=1 SV=1	P0A796	0	1	0	0	0	0	0	0	0	0	0	0	0	0	0	0	0	0
Inorganic pyrophosphatase OS=Escherichia coli (strain K12) GN=ppa PE=1 SV=2	P0A7A9	0	2	0	0	1	0	0	1	0	0	0	0	0	0	1	0	0	0
Glutamate 5-kinase OS=Escherichia coli (strain K12) GN=proB PE=1 SV=1 - [PROB_ECOLI]	P0A7B5	0	0	0	0	1	0	1	2	3	1	2	0	0	0	0	0	0	0
ATP-dependent protease subunit HslV OS=Escherichia coli (strain K12) GN=hslV PE=1 SV=2 - [HSLV_ECOLI]	P0A7B8	0	0	0	0	0	0	0	0	0	0	0	0	0	0	0	0	0	0
CTP synthase OS=Escherichia coli (strain K12) GN=pyrG PE=1 SV=2	P0A7E5	0	1	0	0	1	0	0	1	2	1	1	0	0	0	0	0	0	0
50S ribosomal protein L27 OS=Escherichia coli (strain K12) GN=rpmA PE=1 SV=2	P0A7L8	0	1	0	0	0	0	0	0	0	0	0	0	0	0	0	0	0	0
50S ribosomal protein L31 OS=Escherichia coli (strain K12) GN=rpmE PE=1 SV=1 - [RL31_ECOLI]	P0A7M9	0	0	0	0	0	0	0	0	0	0	0	0	0	0	0	0	0	0
50S ribosomal protein L34 OS=Escherichia coli (strain K12) GN=rpmH PE=1 SV=1	P0A7P5	0	1	0	0	0	0	0	0	0	0	0	0	0	0	0	0	0	0
30S ribosomal protein S10 OS=Escherichia coli (strain K12) GN=rpsJ PE=1 SV=1 - [RS10_ECOLI]	P0A7R5	0	0	0	0	2	0	0	0	2	0	0	0	0	0	0	0	0	0
30S ribosomal protein S11 OS=Escherichia coli (strain K12) GN=rpsK PE=1 SV=2	P0A7R9	3	2	0	0	1	0	0	0	2	0	3	0	0	0	0	0	0	0
30S ribosomal protein S16 OS=Escherichia coli (strain K12) GN=rpsP PE=1 SV=1 - [RS16_ECOLI]	P0A7T3	0	0	0	0	0	0	0	0	0	0	0	0	0	0	0	0	0	0
30S ribosomal protein S18 OS=Escherichia coli (strain K12) GN=rpsR PE=1 SV=2	P0A7T7	0	1	0	0	1	0	0	1	1	0	0	0	0	0	1	0	0	0
30S ribosomal protein S19 OS=Escherichia coli (strain K12) GN=rpsS PE=1 SV=2 - [RS19_ECOLI]	P0A7U3	0	0	0	0	0	0	0	1	0	0	0	0	0	0	0	0	0	0
30S ribosomal protein S20 OS=Escherichia coli (strain K12) GN=rpsT PE=1 SV=2	P0A7U7	1	3	0	0	0	0	0	1	0	0	1	0	0	0	0	0	0	0
30S ribosomal protein S4 OS=Escherichia coli (strain K12) GN=rpsD PE=1 SV=2	P0A7V8	0	2	0	0	0	0	0	2	1	0	0	0	0	0	1	0	0	0
30S ribosomal protein S9 OS=Escherichia coli (strain K12) GN=rpsI PE=1 SV=2 - [RS9_ECOLI]	P0A7X3	0	0	0	0	1	0	0	0	1	0	0	0	0	0	0	0	0	0
DNA-directed RNA polymerase subunit omega OS=Escherichia coli (strain K12) GN=rpoZ PE=1 SV=1 - [RPOZ_ECOLI]	P0A800	0	0	0	0	0	0	0	1	0	0	0	0	0	0	0	0	0	0
Ribosome-recycling factor OS=Escherichia coli (strain K12) GN=frr PE=1 SV=1 - [RRF_ECOLI]	P0A805	0	0	0	0	0	0	0	1	0	0	0	0	0	0	0	0	0	0
Holliday junction ATP-dependent DNA helicase RuvB OS=Escherichia coli (strain K12) GN=ruvB PE=1 SV=1	P0A812	0	0	0	0	1	0	0	0	0	0	0	0	0	0	0	0	0	0
Triosephosphate isomerase OS=Escherichia coli (strain K12) GN=tpiA PE=1 SV=1	P0A858	0	1	0	0	0	0	0	0	0	0	0	0	0	0	0	0	0	0
tRNA (guanine-N(1)-)-methyltransferase OS=Escherichia coli (strain K12) GN=trmD PE=1 SV=1	P0A873	0	1	0	0	0	0	0	0	0	0	0	0	0	0	0	0	0	0
Tryptophan synthase alpha chain OS=Escherichia coli (strain K12) GN=trpA PE=1 SV=1	P0A877	0	0	0	0	1	0	0	0	0	0	0	0	0	0	0	0	0	0
Tryptophan synthase beta chain OS=Escherichia coli (strain K12) GN=trpB PE=1 SV=2	P0A879	0	0	0	0	0	0	0	0	1	0	0	0	0	0	0	0	0	0
UPF0115 protein yfcN OS=Escherichia coli (strain K12) GN=yfcN PE=3 SV=1 - [YFCN_ECOLI]	P0A8B2	0	0	0	0	0	0	0	0	0	0	0	0	0	0	0	0	0	0
UPF0227 protein ycfP OS=Escherichia coli (strain K12) GN=ycfP PE=3 SV=1	P0A8E1	0	0	0	0	1	0	0	0	0	0	0	0	0	0	0	0	0	0
UPF0234 protein YajQ OS=Escherichia coli (strain K12) GN=yajQ PE=1 SV=2	P0A8E7	0	1	0	0	1	0	0	0	0	0	0	0	0	0	0	0	0	0
Uracil phosphoribosyltransferase OS=Escherichia coli (strain K12) GN=upp PE=1 SV=1 - [UPP_ECOLI]	P0A8F0	0	0	0	0	2	0	0	0	0	0	0	0	0	0	0	0	0	0
Uridine kinase OS=Escherichia coli (strain K12) GN=udk PE=3 SV=1 - [URK_ECOLI]	P0A8F4	0	0	0	0	1	0	0	0	0	0	0	0	0	0	0	0	0	0
ATP-dependent RNA helicase rhlB OS=Escherichia coli (strain K12) GN=rhlB PE=1 SV=2 - [RHLB_ECOLI]	P0A8J8	0	0	0	0	0	0	0	1	1	0	3	0	0	0	0	0	0	0
Serine--tRNA ligase OS=Escherichia coli (strain K12) GN=serS PE=1 SV=1	P0A8L1	5	2	0	0	1	0	0	0	0	0	0	0	0	0	0	0	0	0
Asparaginyl-tRNA synthetase OS=Escherichia coli (strain K12) GN=asnS PE=1 SV=2 - [SYN_ECOLI]	P0A8M0	0	0	0	0	1	0	0	0	0	1	0	0	0	0	0	0	0	0
Lysyl-tRNA synthetase, heat inducible OS=Escherichia coli (strain K12) GN=lysU PE=1 SV=2 - [SYK2_ECOLI]	P0A8N5	0	0	0	0	2	0	0	0	0	0	0	0	0	0	0	0	0	0
Tyrosine recombinase XerD OS=Escherichia coli (strain K12) GN=xerD PE=1 SV=1	P0A8P8	1	0	0	0	0	0	0	0	0	0	0	0	0	0	0	0	0	0
Chromosome initiation inhibitor OS=Escherichia coli (strain K12) GN=iciA PE=1 SV=1	P0A8S1	0	0	0	0	1	0	0	0	0	0	0	0	0	0	0	0	0	0
DNA-directed RNA polymerase subunit beta' OS=Escherichia coli (strain K12) GN=rpoC PE=1 SV=1 - [RPOC_ECOLI]	P0A8T7	0	0	0	0	0	0	0	0	5	4	0	0	0	0	0	0	0	0
DNA-directed RNA polymerase subunit beta OS=Escherichia coli (strain K12) GN=rpoB PE=1 SV=1	P0A8V2	0	1	0	0	0	0	0	0	1	4	0	0	0	0	0	0	0	0
UPF0301 protein yqgE OS=Escherichia coli (strain K12) GN=yqgE PE=1 SV=1 - [YQGE_ECOLI]	P0A8W5	0	0	0	0	0	0	0	0	0	0	0	0	0	0	0	0	0	0
Lipoprotein 34 OS=Escherichia coli (strain K12) GN=nlpB PE=1 SV=1	P0A903	0	0	0	0	2	0	0	0	1	0	0	0	0	0	0	0	0	0
3-oxoacyl-[acyl-carrier-protein] synthase 1 OS=Escherichia coli (strain K12) GN=fabB PE=1 SV=1	P0A953	1	2	0	0	0	0	0	0	0	1	1	0	1	0	1	0	0	0
Uncharacterized aminotransferase YfbQ OS=Escherichia coli (strain K12) GN=yfbQ PE=3 SV=1 - [YFBQ_ECOLI]	P0A959	0	0	0	0	1	0	0	0	0	0	0	0	0	0	0	0	0	0
Ferric uptake regulation protein OS=Escherichia coli (strain K12) GN=fur PE=1 SV=1 - [FUR_ECOLI]	P0A9A9	0	0	0	0	1	0	0	0	1	0	0	0	0	0	1	0	0	0
Glutamine synthetase OS=Escherichia coli (strain K12) GN=glnA PE=1 SV=2 - [GLNA_ECOLI]	P0A9C5	0	0	0	0	0	0	0	0	1	1	0	0	0	0	0	0	0	0
Isocitrate lyase OS=Escherichia coli (strain K12) GN=aceA PE=1 SV=1 - [ACEA_ECOLI]	P0A9G6	0	0	0	0	0	0	0	1	0	0	0	0	0	0	0	0	0	0
Lon protease OS=Escherichia coli (strain K12) GN=lon PE=1 SV=1	P0A9M0	6	0	0	0	0	0	0	0	0	0	0	0	0	0	0	0	0	0
Xanthine phosphoribosyltransferase OS=Escherichia coli (strain K12) GN=gpt PE=1 SV=1	P0A9M5	0	1	0	0	0	0	0	0	0	0	0	0	0	0	0	0	0	0
Thioredoxin reductase OS=Escherichia coli (strain K12) GN=trxB PE=1 SV=2	P0A9P4	0	1	0	0	0	0	0	1	0	0	0	0	1	0	1	0	0	0
Cold-shock DEAD box protein A OS=Escherichia coli (strain K12) GN=deaD PE=1 SV=2	P0A9P6	0	1	0	0	0	0	0	0	0	0	0	0	0	0	0	0	0	0
Acetyl-coenzyme A carboxylase carboxyl transferase subunit beta OS=Escherichia coli (strain K12) GN=accD PE=1 SV=1 - [ACCD_ECOLI]	P0A9Q5	0	0	0	0	0	0	0	2	2	0	0	0	0	0	0	0	0	0
Cell division ATP-binding protein FtsE OS=Escherichia coli (strain K12) GN=ftsE PE=1 SV=1	P0A9R7	0	0	0	0	1	0	0	0	0	0	0	0	0	0	0	0	0	0
Galactitol-1-phosphate 5-dehydrogenase OS=Escherichia coli (strain K12) GN=gatD PE=3 SV=1	P0A9S3	0	0	0	0	0	0	0	0	1	0	0	0	0	0	0	0	0	0
D-3-phosphoglycerate dehydrogenase OS=Escherichia coli (strain K12) GN=serA PE=1 SV=2	P0A9T0	0	1	0	0	0	0	0	0	0	0	0	0	0	1	0	0	0	0
Uncharacterized ABC transporter ATP-binding protein YbiT OS=Escherichia coli (strain K12) GN=ybiT PE=3 SV=1 - [YBIT_ECOLI]	P0A9U3	0	0	0	0	0	0	0	0	0	0	1	0	0	0	0	0	0	0
Cold shock-like protein CspC OS=Escherichia coli (strain K12) GN=cspC PE=1 SV=2 - [CSPC_ECOLI]	P0A9Y6	0	0	0	0	2	0	0	0	0	0	0	0	0	0	1	0	0	0
Thioredoxin-1 OS=Escherichia coli (strain K12) GN=trxA PE=1 SV=2	P0AA25	0	0	0	0	1	0	0	0	1	0	0	0	0	0	0	0	0	0
Inner membrane transporter rhtA OS=Escherichia coli (strain K12) GN=rhtA PE=1 SV=1 - [RHTA_ECOLI]	P0AA67	0	0	0	0	0	0	0	0	0	0	0	0	0	0	0	0	0	0
Cytosine permease OS=Escherichia coli (strain K12) GN=codB PE=1 SV=1 - [CODB_ECOLI]	P0AA82	0	0	0	0	0	0	0	0	0	0	0	0	0	0	0	0	0	0
Inner membrane protein ypdA OS=Escherichia coli (strain K12) GN=ypdA PE=1 SV=1 - [YPDA_ECOLI]	P0AA93	0	0	0	0	0	0	0	0	0	0	0	0	0	0	0	0	0	0
Probable cadaverine/lysine antiporter OS=Escherichia coli (strain K12) GN=cadB PE=2 SV=1 - [CADB_ECOLI]	P0AAE8	0	0	0	0	0	0	0	0	0	0	0	0	0	0	1	0	0	0
Glutamate/aspartate transport ATP-binding protein GltL OS=Escherichia coli (strain K12) GN=gltL PE=3 SV=1 - [GLTL_ECOLI]	P0AAG3	0	0	0	0	0	0	0	0	0	0	0	0	0	0	0	0	0	0
ATP-dependent zinc metalloprotease FtsH OS=Escherichia coli (strain K12) GN=ftsH PE=1 SV=1 - [FTSH_ECOLI]	P0AAI3	0	0	0	0	0	0	0	0	0	5	0	0	0	0	0	0	0	0
Uncharacterized protein ybeL OS=Escherichia coli (strain K12) GN=ybeL PE=4 SV=1	P0AAT9	0	0	0	0	1	0	0	0	0	0	0	0	0	0	0	0	0	0
Uncharacterized protein ybgS OS=Escherichia coli (strain K12) GN=ybgS PE=4 SV=1	P0AAV6	0	0	0	0	1	0	0	0	0	0	0	0	0	0	0	0	0	0
Probable L,D-transpeptidase YbiS OS=Escherichia coli (strain K12) GN=ybiS PE=1 SV=1 - [YBIS_ECOLI]	P0AAX8	0	0	0	0	1	0	0	0	0	0	0	0	0	0	0	0	0	0
2-amino-3-ketobutyrate coenzyme A ligase OS=Escherichia coli (strain K12) GN=kbl PE=1 SV=1 - [KBL_ECOLI]	P0AB77	0	0	0	0	1	0	0	0	0	0	0	0	0	0	1	0	0	0
Adenylosuccinate lyase OS=Escherichia coli (strain K12) GN=purB PE=1 SV=1 - [PUR8_ECOLI]	P0AB89	0	0	0	0	0	0	0	0	1	0	0	0	0	0	0	0	0	3
ATP synthase subunit b OS=Escherichia coli (strain K12) GN=atpF PE=1 SV=1 - [ATPF_ECOLI]	P0ABA0	0	0	0	0	0	0	0	0	0	0	0	0	0	0	0	0	0	0
Modulator of FtsH protease HflC OS=Escherichia coli (strain K12) GN=hflC PE=1 SV=1 - [HFLC_ECOLI]	P0ABC3	0	0	0	0	0	0	0	0	0	1	0	0	0	0	0	0	0	0
Modulator of FtsH protease HflK OS=Escherichia coli (strain K12) GN=hflK PE=1 SV=1 - [HFLK_ECOLI]	P0ABC7	0	0	0	0	0	0	0	2	0	3	1	0	0	0	0	0	1	1
Acetyl-coenzyme A carboxylase carboxyl transferase subunit alpha OS=Escherichia coli (strain K12) GN=accA PE=1 SV=2 - [ACCA_ECOLI]	P0ABD5	0	0	0	0	0	0	0	1	0	0	2	0	0	0	0	0	0	0
Cell division protein FtsA OS=Escherichia coli (strain K12) GN=ftsA PE=3 SV=1	P0ABH0	0	0	0	0	1	0	0	0	0	0	0	0	0	0	0	0	0	0
Citrate synthase OS=Escherichia coli (strain K12) GN=gltA PE=1 SV=1	P0ABH7	0	1	0	0	0	0	0	0	0	0	1	0	0	0	0	0	0	0
Cytochrome c-552 OS=Escherichia coli (strain K12) GN=nrfA PE=1 SV=1 - [NRFA_ECOLI]	P0ABK9	0	0	0	0	0	0	0	0	0	0	0	0	0	0	0	1	0	0
GTP-dependent nucleic acid-binding protein EngD OS=Escherichia coli (strain K12) GN=engD PE=1 SV=2	P0ABU2	0	3	0	0	0	0	0	1	0	0	0	0	0	0	0	0	0	0
Flagellar basal-body rod protein flgG OS=Escherichia coli (strain K12) GN=flgG PE=3 SV=1 - [FLGG_ECOLI]	P0ABX5	0	0	0	0	0	0	0	0	0	0	1	0	0	0	0	0	0	0
Flagellar motor switch protein FliG OS=Escherichia coli (strain K12) GN=fliG PE=1 SV=1 - [FLIG_ECOLI]	P0ABZ1	0	0	0	0	0	0	0	0	2	0	0	0	0	0	0	0	0	1
Fumarate hydratase class I, aerobic OS=Escherichia coli (strain K12) GN=fumA PE=1 SV=2 - [FUMA_ECOLI]	P0AC33	0	0	0	0	0	0	0	0	0	0	0	0	0	0	0	0	0	0
Glutaredoxin-4 OS=Escherichia coli (strain K12) GN=grxD PE=1 SV=1	P0AC69	0	0	0	0	1	0	0	0	0	0	0	0	0	0	0	0	0	0
Hemolysin expression-modulating protein Hha OS=Escherichia coli (strain K12) GN=hha PE=1 SV=1 - [HHA_ECOLI]	P0ACE3	0	0	0	0	0	0	0	0	0	0	0	0	0	0	0	0	0	0
cAMP receptor protein OS=Escherichia coli (strain K12) GN=crp PE=1 SV=1	P0ACJ8	0	1	0	0	0	0	0	1	1	0	0	0	0	0	0	0	0	0
HTH-type transcriptional repressor purR OS=Escherichia coli (strain K12) GN=purR PE=1 SV=2 - [PURR_ECOLI]	P0ACP7	0	0	0	0	0	0	0	0	0	0	0	0	0	0	0	0	0	0
Pyruvate kinase I OS=Escherichia coli (strain K12) GN=pykF PE=1 SV=1	P0AD61	0	0	0	0	2	0	0	0	0	0	0	0	0	0	0	0	0	0
Osmotically-inducible lipoprotein E OS=Escherichia coli (strain K12) GN=osmE PE=2 SV=1 - [OSME_ECOLI]	P0ADB1	0	0	0	0	0	0	0	0	0	0	0	0	0	0	0	0	0	0
Uncharacterized protein ygaU OS=Escherichia coli (strain K12) GN=ygaU PE=1 SV=2 - [YGAU_ECOLI]	P0ADE6	0	0	0	0	1	0	0	1	0	0	0	0	0	0	0	0	0	0
tRNA-modifying protein YgfZ OS=Escherichia coli (strain K12) GN=ygfZ PE=1 SV=2	P0ADE8	0	1	0	0	0	0	0	0	0	0	0	0	0	0	0	0	0	0
Uncharacterized protein yhhA OS=Escherichia coli (strain K12) GN=yhhA PE=4 SV=1 - [YHHA_ECOLI]	P0ADX7	0	0	0	0	0	0	0	0	0	0	2	0	0	0	0	0	0	0
tRNA (cytidine/uridine-2'-O-)-methyltransferase TrmJ OS=Escherichia coli (strain K12) GN=trmJ PE=1 SV=1 - [TRMJ_ECOLI]	P0AE01	0	0	0	0	0	0	0	0	0	0	0	0	0	0	0	0	0	0
Putative peroxiredoxin bcp OS=Escherichia coli (strain K12) GN=bcp PE=1 SV=1	P0AE52	0	0	0	0	1	0	0	0	0	0	0	0	0	0	0	0	0	0
Transcriptional regulatory protein CpxR OS=Escherichia coli (strain K12) GN=cpxR PE=3 SV=1	P0AE88	0	0	0	0	1	0	0	0	0	0	0	0	0	0	0	0	0	0
(Dimethylallyl)adenosine tRNA methylthiotransferase MiaB OS=Escherichia coli (strain K12) GN=miaB PE=1 SV=1 - [MIAB_ECOLI]	P0AEI1	0	0	0	0	0	0	0	0	0	0	0	0	0	0	0	0	0	0
Ribosomal protein S12 methylthiotransferase RimO OS=Escherichia coli (strain K12) GN=rimO PE=1 SV=1 - [RIMO_ECOLI]	P0AEI4	0	0	0	0	0	0	0	0	0	0	2	0	0	0	0	0	0	0
Isochorismate synthase entC OS=Escherichia coli (strain K12) GN=entC PE=1 SV=1 - [ENTC_ECOLI]	P0AEJ2	0	0	0	0	0	0	0	0	2	0	0	0	0	0	0	0	0	0
Enoyl-[acyl-carrier-protein] reductase [NADH] FabI OS=Escherichia coli (strain K12) GN=fabI PE=1 SV=2	P0AEK4	0	1	0	0	1	0	0	2	0	0	0	0	0	0	0	0	0	0
Glutamate/aspartate transport system permease protein gltJ OS=Escherichia coli (strain K12) GN=gltJ PE=3 SV=1 - [GLTJ_ECOLI]	P0AER3	0	0	0	0	1	0	0	0	0	0	0	0	1	0	0	0	0	0
DNA gyrase subunit B OS=Escherichia coli (strain K12) GN=gyrB PE=1 SV=2 - [GYRB_ECOLI]	P0AES6	0	0	0	0	2	0	0	0	0	1	1	0	0	0	0	0	0	0
5,10-methylenetetrahydrofolate reductase OS=Escherichia coli (strain K12) GN=metF PE=1 SV=1	P0AEZ1	0	0	0	0	1	0	0	0	0	0	0	0	0	0	0	0	0	0
Molybdenum cofactor biosynthesis protein B OS=Escherichia coli (strain K12) GN=moaB PE=1 SV=2	P0AEZ9	0	0	0	0	1	0	0	0	0	0	0	0	0	0	0	0	0	0
Nitrogen regulation protein NR(II) OS=Escherichia coli (strain K12) GN=glnL PE=1 SV=1 - [NTRB_ECOLI]	P0AFB5	0	0	0	0	0	0	0	0	0	0	0	0	0	0	0	0	0	0
Transcription elongation protein nusA OS=Escherichia coli (strain K12) GN=nusA PE=1 SV=1 - [NUSA_ECOLI]	P0AFF6	0	0	0	0	1	0	0	1	0	0	0	0	0	0	0	0	0	0
Dihydrolipoyllysine-residue succinyltransferase component of 2-oxoglutarate dehydrogenase complex OS=Escherichia coli (strain K12) GN=sucB PE=1 SV=2	P0AFG6	0	1	0	0	0	0	0	1	0	0	2	0	0	0	0	0	1	2
Pyruvate dehydrogenase E1 component OS=Escherichia coli (strain K12) GN=aceE PE=1 SV=2 - [ODP1_ECOLI]	P0AFG8	0	0	0	0	0	0	0	0	0	0	0	0	0	0	0	0	0	0
DNA topoisomerase 4 subunit A OS=Escherichia coli (strain K12) GN=parC PE=1 SV=1	P0AFI2	10	0	0	0	0	0	0	0	0	0	0	0	0	0	0	0	0	0
Pyridoxine/pyridoxamine 5'-phosphate oxidase OS=Escherichia coli (strain K12) GN=pdxH PE=1 SV=2	P0AFI7	0	0	0	0	1	0	0	0	0	0	0	0	0	0	0	0	0	0
Putative permease perM OS=Escherichia coli (strain K12) GN=perM PE=3 SV=1 - [PERM_ECOLI]	P0AFI9	0	0	0	0	0	0	0	0	0	0	0	0	0	0	0	0	0	0
Protein pmbA OS=Escherichia coli (strain K12) GN=pmbA PE=1 SV=1 - [PMBA_ECOLI]	P0AFK0	0	0	0	0	0	0	0	0	0	0	0	0	0	0	0	0	0	0
Stringent starvation protein B OS=Escherichia coli (strain K12) GN=sspB PE=1 SV=1 - [SSPB_ECOLI]	P0AFZ3	0	0	0	0	0	0	0	0	0	0	0	0	0	0	0	0	0	0
GTP pyrophosphokinase OS=Escherichia coli (strain K12) GN=relA PE=1 SV=1	P0AG20	0	0	0	0	1	0	0	0	0	0	0	0	0	0	0	0	0	0
30S ribosomal protein S1 OS=Escherichia coli (strain K12) GN=rpsA PE=1 SV=1	P0AG67	0	0	0	0	0	0	0	0	1	0	0	0	0	0	0	0	0	0
Protein-export protein SecB OS=Escherichia coli (strain K12) GN=secB PE=1 SV=1 - [SECB_ECOLI]	P0AG86	0	0	0	0	1	0	0	0	0	0	0	0	0	0	0	0	0	0
Protein translocase subunit SecD OS=Escherichia coli (strain K12) GN=secD PE=1 SV=1	P0AG90	0	0	0	0	2	0	0	0	0	0	0	0	0	0	0	0	0	0
Protein translocase subunit SecF OS=Escherichia coli (strain K12) GN=secF PE=1 SV=1 - [SECF_ECOLI]	P0AG93	0	0	0	0	0	0	0	0	0	0	0	0	0	0	0	0	0	0
Superoxide dismutase [Fe] OS=Escherichia coli (strain K12) GN=sodB PE=1 SV=2	P0AGD3	0	0	0	0	1	0	0	0	0	0	0	0	0	0	0	0	0	0
Single-stranded DNA-binding protein OS=Escherichia coli (strain K12) GN=ssb PE=1 SV=2 - [SSB_ECOLI]	P0AGE0	0	0	0	0	0	0	0	0	0	0	0	0	0	0	0	0	0	0
Succinyl-CoA ligase [ADP-forming] subunit alpha OS=Escherichia coli (strain K12) GN=sucD PE=1 SV=2	P0AGE9	0	3	0	0	0	0	0	0	0	0	0	0	0	0	0	0	0	0
Trk system potassium uptake protein trkA OS=Escherichia coli (strain K12) GN=trkA PE=1 SV=1 - [TRKA_ECOLI]	P0AGI8	0	0	0	0	0	0	0	0	0	0	0	0	0	0	0	0	0	0
Protein tdcF OS=Escherichia coli (strain K12) GN=tdcF PE=1 SV=1	P0AGL2	0	0	0	0	1	0	0	0	0	0	0	0	0	0	0	0	0	0
50S ribosomal protein L18 OS=Escherichia coli (strain K12) GN=rplR PE=1 SV=1	P0C018	1	2	0	0	0	0	0	0	0	0	0	0	0	0	0	0	0	0
Peroxiredoxin osmC OS=Escherichia coli (strain K12) GN=osmC PE=1 SV=2 - [OSMC_ECOLI]	P0C0L2	0	0	0	0	1	0	0	0	0	0	0	0	0	0	0	0	0	0
Ribosomal RNA large subunit methyltransferase E OS=Escherichia coli (strain K12) GN=rlmE PE=1 SV=1 - [RLME_ECOLI]	P0C0R7	0	0	0	0	0	0	0	0	0	0	0	0	0	0	0	0	0	0
Periplasmic serine endoprotease DegP OS=Escherichia coli (strain K12) GN=degP PE=1 SV=1 - [DEGP_ECOLI]	P0C0V0	0	0	0	0	0	0	0	0	0	0	0	0	0	0	0	0	0	0
D-tagatose-1,6-bisphosphate aldolase subunit gatZ OS=Escherichia coli (strain K12) GN=gatZ PE=1 SV=1 - [GATZ_ECOLI]	P0C8J8	0	0	0	0	0	0	0	0	1	0	1	0	0	0	0	0	0	0
Elongation factor Tu 2 OS=Escherichia coli (strain K12) GN=tufB PE=1 SV=1	P0CE48	0	0	0	0	11	0	0	0	7	0	0	0	0	0	0	0	0	0
Putative lipoprotein AcfD homolog OS=Escherichia coli (strain K12) GN=yghJ PE=4 SV=1 - [ACFD_ECOLI]	P0CK95	0	0	0	0	0	0	0	0	0	0	0	0	1	0	0	0	0	0
L-aspartate oxidase OS=Escherichia coli (strain K12) GN=nadB PE=1 SV=4	P10902	0	1	0	0	0	0	0	0	2	0	0	0	0	0	0	0	0	0
N-acetyl-gamma-glutamyl-phosphate reductase OS=Escherichia coli (strain K12) GN=argC PE=3 SV=1	P11446	0	1	0	0	0	0	0	1	0	0	0	0	0	0	0	0	0	0
Enterobactin synthase component F OS=Escherichia coli (strain K12) GN=entF PE=1 SV=3 - [ENTF_ECOLI]	P11454	0	0	0	0	0	0	0	0	0	1	0	0	0	0	0	0	0	0
Methionine synthase OS=Escherichia coli (strain K12) GN=metH PE=1 SV=5 - [METH_ECOLI]	P13009	0	0	0	0	0	0	0	1	0	0	1	0	0	0	0	0	0	0
2,3-dihydro-2,3-dihydroxybenzoate dehydrogenase OS=Escherichia coli (strain K12) GN=entA PE=1 SV=1	P15047	0	1	0	0	0	0	0	0	0	0	0	0	0	0	0	0	0	0
Flagellar motor switch protein FliN OS=Escherichia coli (strain K12) GN=fliN PE=1 SV=1 - [FLIN_ECOLI]	P15070	0	0	0	0	0	0	0	0	0	0	1	0	0	0	0	0	0	0
Deoxyguanosinetriphosphate triphosphohydrolase OS=Escherichia coli (strain K12) GN=dgt PE=1 SV=4	P15723	0	1	0	0	0	0	0	0	0	0	0	0	0	0	0	0	0	0
Sulfate/thiosulfate import ATP-binding protein CysA OS=Escherichia coli (strain K12) GN=cysA PE=3 SV=2 - [CYSA_ECOLI]	P16676	0	0	0	0	0	0	0	0	0	0	0	0	0	0	0	0	0	0
FhuE receptor OS=Escherichia coli (strain K12) GN=fhuE PE=1 SV=2 - [FHUE_ECOLI]	P16869	0	0	0	0	0	0	0	0	0	0	0	0	0	0	1	0	0	0
UDP-N-acetylmuramate--L-alanine ligase OS=Escherichia coli (strain K12) GN=murC PE=1 SV=2	P17952	0	0	0	0	0	0	0	0	1	0	0	0	0	0	0	0	0	0
Septum site-determining protein MinC OS=Escherichia coli (strain K12) GN=minC PE=1 SV=1	P18196	0	1	0	0	0	0	0	0	0	0	0	0	1	0	0	0	0	0
NH(3)-dependent NAD(+) synthetase OS=Escherichia coli (strain K12) GN=nadE PE=1 SV=2	P18843	0	1	0	0	0	0	0	0	0	0	0	0	0	0	0	0	0	0
PTS system maltose- and glucose-specific EIICB component OS=Escherichia coli (strain K12) GN=malX PE=2 SV=3 - [PTOCB_ECOLI]	P19642	0	0	0	0	0	0	0	0	0	0	0	0	1	1	0	0	0	0
DNA topoisomerase 4 subunit B OS=Escherichia coli (strain K12) GN=parE PE=1 SV=3 - [PARE_ECOLI]	P20083	0	0	0	0	1	0	0	1	1	1	0	0	0	0	0	0	0	0
Sulfate adenylyltransferase subunit 2 OS=Escherichia coli (strain K12) GN=cysD PE=1 SV=3 - [CYSD_ECOLI]	P21156	0	0	0	0	0	0	0	0	1	0	1	0	0	0	0	0	0	0
Biosynthetic arginine decarboxylase OS=Escherichia coli (strain K12) GN=speA PE=1 SV=2 - [SPEA_ECOLI]	P21170	0	0	0	0	0	0	0	0	0	1	0	0	0	0	0	0	0	0
Ribonuclease E OS=Escherichia coli (strain K12) GN=rne PE=1 SV=6 - [RNE_ECOLI]	P21513	0	0	0	0	0	0	1	3	3	2	4	0	0	0	0	0	0	0
Pyruvate kinase II OS=Escherichia coli (strain K12) GN=pykA PE=1 SV=3	P21599	0	1	0	0	0	0	0	0	0	0	0	0	0	0	0	0	0	0
Asparagine synthetase B [glutamine-hydrolyzing] OS=Escherichia coli (strain K12) GN=asnB PE=1 SV=3 - [ASNB_ECOLI]	P22106	0	0	0	0	1	0	0	0	1	0	0	0	0	0	0	0	0	0
Chromosome partition protein MukB OS=Escherichia coli (strain K12) GN=mukB PE=1 SV=2	P22523	3	0	0	0	0	0	0	0	3	0	3	0	0	0	0	0	0	0
Thymidine kinase OS=Escherichia coli (strain K12) GN=tdk PE=3 SV=1	P23331	0	0	0	0	2	0	0	0	0	0	0	0	0	0	0	0	0	0
Phosphoserine aminotransferase OS=Escherichia coli (strain K12) GN=serC PE=1 SV=4 - [SERC_ECOLI]	P23721	0	0	0	0	0	0	0	1	0	0	0	0	0	0	0	0	0	0
Transcriptional regulatory protein phoP OS=Escherichia coli (strain K12) GN=phoP PE=1 SV=1	P23836	0	0	0	0	2	0	0	0	0	0	0	0	0	0	0	0	0	0
Sulfate adenylyltransferase subunit 1 OS=Escherichia coli (strain K12) GN=cysN PE=1 SV=1 - [CYSN_ECOLI]	P23845	0	0	0	0	0	0	0	0	1	1	1	0	0	0	0	0	0	0
Periplasmic dipeptide transport protein OS=Escherichia coli (strain K12) GN=dppA PE=1 SV=1	P23847	0	1	0	0	0	0	0	0	0	0	0	0	0	0	0	0	0	0
Peptidyl-prolyl cis-trans isomerase B OS=Escherichia coli (strain K12) GN=ppiB PE=1 SV=2	P23869	0	0	0	0	1	0	0	0	0	0	0	0	0	0	0	0	0	0
Biotin carboxylase OS=Escherichia coli (strain K12) GN=accC PE=1 SV=2 - [ACCC_ECOLI]	P24182	0	0	0	0	1	0	0	0	2	3	0	0	0	0	0	0	0	0
Hydrogenase isoenzymes formation protein hypE OS=Escherichia coli (strain K12) GN=hypE PE=1 SV=2 - [HYPE_ECOLI]	P24193	0	0	0	0	1	0	0	0	0	0	0	0	0	0	0	0	0	0
Uncharacterized GTP-binding protein YjiA OS=Escherichia coli (strain K12) GN=yjiA PE=1 SV=3 - [YJIA_ECOLI]	P24203	0	0	0	0	0	0	0	0	0	0	0	0	0	0	0	0	0	0
Sigma factor-binding protein crl OS=Escherichia coli (strain K12) GN=crl PE=1 SV=5 - [CRL_ECOLI]	P24251	0	0	0	0	2	0	0	0	1	0	0	0	0	0	0	0	0	0
RNA polymerase sigma-54 factor OS=Escherichia coli (strain K12) GN=rpoN PE=3 SV=2	P24255	0	0	0	0	0	0	0	0	1	0	0	0	0	0	0	0	0	0
DNA repair protein RadA OS=Escherichia coli (strain K12) GN=radA PE=3 SV=1 - [RADA_ECOLI]	P24554	0	0	0	0	0	0	0	0	0	0	2	0	0	0	0	0	0	0
Riboflavin biosynthesis protein RibD OS=Escherichia coli (strain K12) GN=ribD PE=1 SV=1 - [RIBD_ECOLI]	P25539	0	0	0	0	0	0	0	0	0	0	0	0	0	0	0	0	0	0
Lactaldehyde dehydrogenase OS=Escherichia coli (strain K12) GN=aldA PE=1 SV=2 - [ALDA_ECOLI]	P25553	0	0	0	0	0	0	0	1	0	1	1	0	0	0	0	0	0	0
tRNA-specific 2-thiouridylase mnmA OS=Escherichia coli (strain K12) GN=mnmA PE=1 SV=4 - [MNMA_ECOLI]	P25745	0	0	0	0	0	0	0	0	0	0	0	0	0	0	0	0	0	0
Flagellar M-ring protein OS=Escherichia coli (strain K12) GN=fliF PE=3 SV=3 - [FLIF_ECOLI]	P25798	0	0	0	0	0	0	0	1	0	2	6	0	0	0	0	0	1	2
Cytoplasmic alpha-amylase OS=Escherichia coli (strain K12) GN=amyA PE=3 SV=3 - [AMY2_ECOLI]	P26612	0	0	0	0	0	0	0	0	0	0	0	0	0	0	0	1	0	0
Lipopolysaccharide 1,6-galactosyltransferase OS=Escherichia coli (strain K12) GN=rfaB PE=3 SV=2 - [RFAB_ECOLI]	P27127	0	0	0	0	0	0	0	0	0	0	0	0	0	0	0	0	0	0
Aminomethyltransferase OS=Escherichia coli (strain K12) GN=gcvT PE=1 SV=3	P27248	0	1	0	0	0	0	0	0	0	0	0	0	0	0	0	0	0	0
Oligopeptidase A OS=Escherichia coli (strain K12) GN=prlC PE=3 SV=3 - [OPDA_ECOLI]	P27298	0	0	0	0	0	0	0	0	0	0	0	0	0	0	0	0	0	0
Transketolase 1 OS=Escherichia coli (strain K12) GN=tktA PE=1 SV=5 - [TKT1_ECOLI]	P27302	0	0	0	0	0	0	0	1	0	0	0	0	0	0	0	0	0	0
Heat shock protein C OS=Escherichia coli (strain K12) GN=htrC PE=1 SV=1 - [HTRC_ECOLI]	P27375	0	0	0	0	0	0	0	0	0	0	0	0	0	0	1	0	0	0
Outer membrane usher protein fimD OS=Escherichia coli (strain K12) GN=fimD PE=1 SV=2	P30130	0	0	0	0	1	0	0	0	0	0	0	0	0	0	0	0	0	0
Exoribonuclease 2 OS=Escherichia coli (strain K12) GN=rnb PE=1 SV=3 - [RNB_ECOLI]	P30850	0	0	0	0	0	0	0	0	0	0	0	0	0	0	0	0	0	0
Uncharacterized HTH-type transcriptional regulator yafC OS=Escherichia coli (strain K12) GN=yafC PE=4 SV=1 - [YAFC_ECOLI]	P30864	0	0	0	0	1	0	0	4	6	1	5	0	0	0	0	0	0	0
LPS-assembly protein lptD OS=Escherichia coli (strain K12) GN=lptD PE=1 SV=2 - [LPTD_ECOLI]	P31554	0	0	0	0	0	0	0	0	0	0	1	0	0	0	0	0	0	0
Protein fixB OS=Escherichia coli (strain K12) GN=fixB PE=3 SV=3 - [FIXB_ECOLI]	P31574	0	0	0	0	0	0	0	0	0	0	0	0	0	0	0	0	0	0
GTP-binding protein TypA/BipA OS=Escherichia coli (strain K12) GN=typA PE=1 SV=2	P32132	0	2	0	0	1	0	0	2	1	1	0	0	0	0	1	0	0	0
Uncharacterized protein yjfC OS=Escherichia coli (strain K12) GN=yjfC PE=4 SV=2 - [YJFC_ECOLI]	P33222	0	0	0	0	0	0	0	0	0	0	0	0	0	0	0	0	0	0
Uncharacterized protein yehP OS=Escherichia coli (strain K12) GN=yehP PE=4 SV=1 - [YEHP_ECOLI]	P33352	0	0	0	0	0	0	0	0	0	0	0	0	0	0	0	0	1	0
Transketolase 2 OS=Escherichia coli (strain K12) GN=tktB PE=1 SV=1	P33570	0	1	0	0	0	0	0	0	0	0	0	0	0	0	0	0	0	0
Putative glyceraldehyde-3-phosphate dehydrogenase C OS=Escherichia coli (strain K12) GN=gapC PE=5 SV=2	P33898	0	0	0	0	1	0	0	0	0	0	0	0	0	0	0	0	0	0
Uncharacterized ABC transporter ATP-binding protein YejF OS=Escherichia coli (strain K12) GN=yejF PE=3 SV=1	P33916	0	0	0	0	1	0	0	0	0	0	0	0	0	0	0	0	0	0
Alkyl hydroperoxide reductase subunit F OS=Escherichia coli (strain K12) GN=ahpF PE=1 SV=2	P35340	0	1	0	0	0	0	0	0	0	0	0	0	0	0	0	0	0	0
Curved DNA-binding protein OS=Escherichia coli (strain K12) GN=cbpA PE=1 SV=2 - [CBPA_ECOLI]	P36659	0	0	0	0	0	0	0	0	0	1	0	0	0	0	0	0	0	0
Ribosomal RNA small subunit methyltransferase B OS=Escherichia coli (strain K12) GN=rsmB PE=1 SV=2	P36929	0	0	0	0	1	0	0	0	0	0	0	0	0	0	0	0	0	0
Phosphoglucomutase OS=Escherichia coli (strain K12) GN=pgm PE=1 SV=1	P36938	0	0	0	0	0	0	0	0	1	0	0	0	0	0	0	0	0	0
Ribosomal RNA large subunit methyltransferase N OS=Escherichia coli (strain K12) GN=rlmN PE=1 SV=1	P36979	0	0	0	0	1	0	0	0	0	0	0	0	0	0	0	0	0	0
Phosphoenolpyruvate-protein phosphotransferase PtsP OS=Escherichia coli (strain K12) GN=ptsP PE=3 SV=2	P37177	0	1	0	0	0	0	0	0	0	0	0	0	0	0	0	0	0	0
Hydrogenase 2 maturation protease OS=Escherichia coli (strain K12) GN=hybD PE=1 SV=2 - [HYBD_ECOLI]	P37182	0	0	0	0	0	0	0	0	0	0	0	0	0	0	0	0	0	0
Inner membrane protein yfdC OS=Escherichia coli (strain K12) GN=yfdC PE=1 SV=1	P37327	0	0	0	0	1	0	0	0	0	0	0	0	0	0	0	0	0	0
Uncharacterized protein ycaI OS=Escherichia coli (strain K12) GN=ycaI PE=4 SV=3 - [YCAI_ECOLI]	P37443	0	0	0	0	0	0	0	0	0	0	0	0	0	0	0	0	0	0
Uncharacterized ABC transporter ATP-binding protein YhiH OS=Escherichia coli (strain K12) GN=yhiH PE=3 SV=3 - [YHIH_ECOLI]	P37624	0	0	0	0	0	0	0	1	0	0	0	0	0	0	0	0	0	0
2-dehydro-3-deoxygluconokinase OS=Escherichia coli (strain K12) GN=kdgK PE=3 SV=1	P37647	0	1	0	0	0	0	0	0	0	0	0	0	0	0	0	0	0	0
2,3-bisphosphoglycerate-independent phosphoglycerate mutase OS=Escherichia coli (strain K12) GN=gpmI PE=1 SV=1 - [GPMI_ECOLI]	P37689	0	0	0	0	1	0	0	0	0	0	0	0	0	0	0	0	0	0
Uncharacterized protein yefG OS=Escherichia coli (strain K12) GN=yefG PE=4 SV=1 - [YEFG_ECOLI]	P37749	0	0	0	0	1	0	0	0	0	0	0	0	0	0	0	0	0	0
Universal stress protein F OS=Escherichia coli (strain K12) GN=uspF PE=1 SV=2 - [USPF_ECOLI]	P37903	0	0	0	0	0	0	0	0	0	0	1	0	0	0	0	0	0	0
Uxu operon transcriptional regulator OS=Escherichia coli (strain K12) GN=uxuR PE=4 SV=1 - [UXUR_ECOLI]	P39161	0	0	0	0	0	0	0	0	0	0	0	0	0	0	0	0	0	0
Antigen 43 OS=Escherichia coli (strain K12) GN=flu PE=1 SV=3	P39180	1	3	0	0	0	0	0	1	0	0	0	0	0	0	0	0	0	0
50S ribosomal protein L3 glutamine methyltransferase OS=Escherichia coli (strain K12) GN=prmB PE=1 SV=3 - [PRMB_ECOLI]	P39199	0	0	0	0	0	0	0	1	4	3	6	0	0	0	0	0	0	0
Probable 9-O-acetyl-N-acetylneuraminic acid deacetylase OS=Escherichia coli (strain K12) GN=nanS PE=2 SV=1	P39370	0	0	0	0	1	0	0	0	0	0	0	0	0	0	0	0	0	0
Uncharacterized protein yjjU OS=Escherichia coli (strain K12) GN=yjjU PE=3 SV=1 - [YJJU_ECOLI]	P39407	0	0	0	0	0	0	0	0	0	0	1	0	0	0	0	0	0	0
Pyridoxine kinase OS=Escherichia coli (strain K12) GN=pdxK PE=1 SV=2	P40191	0	0	0	0	1	0	0	0	0	0	0	0	0	0	0	0	0	0
Sensor protein QseC OS=Escherichia coli (strain K12) GN=qseC PE=1 SV=2	P40719	0	1	0	0	0	0	0	0	0	0	0	0	0	0	0	0	0	0
GTPase ObgE/CgtA OS=Escherichia coli (strain K12) GN=obgE PE=1 SV=1	P42641	0	1	0	0	0	0	0	0	0	0	0	0	0	0	0	0	0	0
Paraquat-inducible protein B OS=Escherichia coli (strain K12) GN=pqiB PE=2 SV=2 - [PQIB_ECOLI]	P43671	0	0	0	0	0	0	0	0	2	0	3	0	0	0	0	0	0	0
Arabinose 5-phosphate isomerase KdsD OS=Escherichia coli (strain K12) GN=kdsD PE=1 SV=1 - [KDSD_ECOLI]	P45395	0	0	0	0	0	0	0	0	0	0	1	0	0	0	0	0	0	0
FKBP-type peptidyl-prolyl cis-trans isomerase fkpA OS=Escherichia coli (strain K12) GN=fkpA PE=1 SV=1 - [FKBA_ECOLI]	P45523	0	0	0	0	1	0	0	0	0	0	0	0	0	0	0	0	0	0
1-deoxy-D-xylulose 5-phosphate reductoisomerase OS=Escherichia coli (strain K12) GN=dxr PE=1 SV=2	P45568	0	1	0	0	0	0	0	0	0	0	0	0	0	0	0	0	0	0
4-hydroxy-2-oxovalerate aldolase OS=Escherichia coli (strain K12) GN=mhpE PE=1 SV=2 - [HOA_ECOLI]	P51020	0	0	0	0	0	0	0	0	0	0	0	1	1	0	0	0	0	0
RNA polymerase-associated protein rapA OS=Escherichia coli (strain K12) GN=rapA PE=1 SV=2 - [RAPA_ECOLI]	P60240	0	0	0	0	0	0	0	0	0	0	1	0	0	0	0	0	0	0
50S ribosomal protein L2 OS=Escherichia coli (strain K12) GN=rplB PE=1 SV=2 - [RL2_ECOLI]	P60422	0	0	0	0	0	0	0	1	0	0	0	0	0	0	0	0	0	0
GMP reductase OS=Escherichia coli (strain K12) GN=guaC PE=1 SV=1	P60560	0	1	0	0	0	0	0	0	0	0	0	0	0	0	0	0	0	0
50S ribosomal protein L24 OS=Escherichia coli (strain K12) GN=rplX PE=1 SV=2 - [RL24_ECOLI]	P60624	0	0	0	0	0	0	0	0	0	0	0	0	0	0	0	0	0	0
Lipoyl synthase OS=Escherichia coli (strain K12) GN=lipA PE=1 SV=1 - [LIPA_ECOLI]	P60716	0	0	0	0	1	0	0	0	0	0	0	0	0	0	0	0	0	0
ATP phosphoribosyltransferase OS=Escherichia coli (strain K12) GN=hisG PE=1 SV=1 - [HIS1_ECOLI]	P60757	0	0	0	0	0	0	0	0	0	0	0	0	0	0	0	0	0	0
Histidine--tRNA ligase OS=Escherichia coli (strain K12) GN=hisS PE=1 SV=2	P60906	0	1	0	0	0	0	0	0	0	0	0	0	0	0	0	0	0	0
Carbonic anhydrase 2 OS=Escherichia coli (strain K12) GN=can PE=1 SV=1 - [CAN_ECOLI]	P61517	0	0	0	0	1	0	0	1	0	0	0	0	0	0	0	0	0	0
50S ribosomal protein L5 OS=Escherichia coli (strain K12) GN=rplE PE=1 SV=2 - [RL5_ECOLI]	P62399	0	0	0	0	0	0	0	0	0	0	0	0	0	0	0	0	0	0
UPF0325 protein yaeH OS=Escherichia coli (strain K12) GN=yaeH PE=3 SV=1	P62768	0	0	0	0	1	0	0	0	0	0	0	0	0	0	0	0	0	0
Chaperone protein ClpB OS=Escherichia coli (strain K12) GN=clpB PE=1 SV=1	P63284	0	1	0	0	0	0	0	0	1	2	0	0	0	0	0	0	0	0
Isoform ClpB-3 of Chaperone protein ClpB OS=Escherichia coli (strain K12) GN=clpB - [CLPB_ECOLI]	P63284-2	0	0	0	0	0	0	0	4	0	0	5	0	0	0	0	0	0	0
Uncharacterized protein ypfJ OS=Escherichia coli (strain K12) GN=ypfJ PE=4 SV=1	P64429	0	0	0	0	1	0	0	0	0	0	0	0	0	0	0	0	0	0
Probable phospholipid ABC transporter permease protein mlaE OS=Escherichia coli (strain K12) GN=mlaE PE=1 SV=1 - [MLAE_ECOLI]	P64606	0	0	0	0	0	0	0	1	0	0	0	0	0	0	0	0	0	0
Uncharacterized protein YhcM OS=Escherichia coli (strain K12) GN=yhcM PE=1 SV=1 - [YHCM_ECOLI]	P64612	0	0	0	0	0	0	0	0	0	0	0	0	0	0	0	0	0	0
DnaA initiator-associating protein DiaA OS=Escherichia coli (strain K12) GN=diaA PE=1 SV=1	P66817	0	1	0	0	0	0	0	0	0	0	0	0	0	0	0	0	0	0
UPF0073 inner membrane protein yqfA OS=Escherichia coli (strain K12) GN=yqfA PE=1 SV=1 - [YQFA_ECOLI]	P67153	0	0	0	0	0	0	0	0	0	0	0	0	0	0	0	0	0	0
UPF0306 protein yhbP OS=Escherichia coli (strain K12) GN=yhbP PE=3 SV=1	P67762	0	0	0	0	0	0	0	0	1	0	0	0	0	0	0	0	0	0
30S ribosomal protein S21 OS=Escherichia coli (strain K12) GN=rpsU PE=1 SV=2	P68679	1	1	0	0	0	0	0	0	0	0	0	0	0	0	0	0	0	0
50S ribosomal protein L25 OS=Escherichia coli (strain K12) GN=rplY PE=1 SV=1 - [RL25_ECOLI]	P68919	0	0	0	0	0	0	0	0	0	0	0	0	0	0	0	0	0	0
Capsular synthesis regulator component B OS=Escherichia coli (strain K12) GN=rcsB PE=1 SV=1	P69407	0	0	0	0	1	0	0	0	0	0	0	0	0	0	0	0	0	0
Adenylate kinase OS=Escherichia coli (strain K12) GN=adk PE=1 SV=1	P69441	0	1	0	0	0	0	0	0	0	0	0	18	22	18	17	0	0	4
Glutamate decarboxylase alpha OS=Escherichia coli (strain K12) GN=gadA PE=1 SV=1 - [DCEA_ECOLI]	P69908	0	0	0	0	0	0	0	2	1	0	0	0	0	0	0	0	0	0
Glutamate decarboxylase beta OS=Escherichia coli (strain K12) GN=gadB PE=1 SV=1	P69910	0	0	0	0	0	0	0	0	1	0	0	0	0	0	0	0	0	0
Carbon storage regulator OS=Escherichia coli (strain K12) GN=csrA PE=1 SV=1 - [CSRA_ECOLI]	P69913	0	0	0	0	0	0	0	0	0	0	0	0	1	0	0	0	0	0
Uncharacterized protein yagM OS=Escherichia coli (strain K12) GN=yagM PE=4 SV=1 - [YAGM_ECOLI]	P71296	0	0	0	0	0	0	0	0	0	0	0	0	0	0	0	0	0	1
Uncharacterized lipoprotein ybfP OS=Escherichia coli (strain K12) GN=ybfP PE=4 SV=1 - [YBFP_ECOLI]	P75737	0	0	0	0	0	0	0	0	0	0	0	0	0	0	0	1	0	0
Uncharacterized protein ybgK OS=Escherichia coli (strain K12) GN=ybgK PE=4 SV=1 - [YBGK_ECOLI]	P75745	0	0	0	0	0	0	0	0	0	0	0	0	0	0	0	0	0	0
Glutathione-binding protein gsiB OS=Escherichia coli (strain K12) GN=gsiB PE=1 SV=1	P75797	0	0	0	0	1	0	0	0	0	0	0	0	0	0	0	0	0	0
Uncharacterized lipoprotein ybjP OS=Escherichia coli (strain K12) GN=ybjP PE=1 SV=1 - [YBJP_ECOLI]	P75818	0	0	0	0	0	0	0	0	2	0	2	0	0	0	0	0	0	0
Uncharacterized protein ybjT OS=Escherichia coli (strain K12) GN=ybjT PE=4 SV=2 - [YBJT_ECOLI]	P75822	0	0	0	0	0	0	0	1	0	0	0	0	0	0	0	0	0	0
Uncharacterized protein ybjE OS=Escherichia coli (strain K12) GN=ybjE PE=4 SV=2 - [YBJE_ECOLI]	P75826	0	0	0	0	0	0	0	0	0	0	0	0	0	1	0	0	0	0
Uncharacterized protein ycbL OS=Escherichia coli (strain K12) GN=ycbL PE=3 SV=1	P75849	0	0	0	0	1	0	0	0	0	0	0	0	0	0	0	0	0	0
Flagella basal body P-ring formation protein flgA OS=Escherichia coli (strain K12) GN=flgA PE=3 SV=1 - [FLGA_ECOLI]	P75933	0	0	0	0	0	0	0	0	0	0	0	1	0	0	0	0	0	0
Probable two-component-system connector protein YcgZ OS=Escherichia coli (strain K12) GN=ycgZ PE=2 SV=1 - [YCGZ_ECOLI]	P75991	0	0	0	0	0	0	0	0	0	0	0	0	1	0	0	0	0	0
PTS-dependent dihydroxyacetone kinase, ADP-binding subunit dhaL OS=Escherichia coli (strain K12) GN=dhaL PE=1 SV=3 - [DHAL_ECOLI]	P76014	0	0	0	0	0	0	0	0	0	0	1	0	0	0	0	0	0	0
Uncharacterized HTH-type transcriptional regulator yciT OS=Escherichia coli (strain K12) GN=yciT PE=4 SV=1 - [YCIT_ECOLI]	P76034	0	0	0	0	0	0	0	0	0	0	0	0	0	0	0	0	0	0
Oxygen sensor protein DosP OS=Escherichia coli (strain K12) GN=dosP PE=1 SV=4	P76129	0	1	0	0	0	0	0	0	0	0	0	0	0	0	0	0	0	0
Anaerobic sulfatase-maturating enzyme homolog YdeM OS=Escherichia coli (strain K12) GN=ydeM PE=1 SV=2 - [YDEM_ECOLI]	P76134	0	0	0	0	0	0	0	0	0	0	0	0	0	0	0	0	0	1
Uncharacterized protein YneF OS=Escherichia coli (strain K12) GN=yneF PE=4 SV=1 - [YNEF_ECOLI]	P76147	0	0	0	0	0	0	0	0	0	0	0	0	0	0	0	0	0	1
Protein ves OS=Escherichia coli (strain K12) GN=ves PE=1 SV=2 - [VES_ECOLI]	P76214	0	0	0	0	0	0	0	0	0	0	0	0	0	1	0	0	0	0
Inner membrane protein ynjI OS=Escherichia coli (strain K12) GN=ynjI PE=1 SV=2 - [YNJI_ECOLI]	P76228	0	0	0	0	0	0	0	0	0	0	0	0	0	0	0	0	0	1
Transcriptional regulator kdgR OS=Escherichia coli (strain K12) GN=kdgR PE=1 SV=1 - [KDGR_ECOLI]	P76268	0	0	0	0	1	0	0	0	0	0	0	0	0	0	0	0	0	0
Protein yebR OS=Escherichia coli (strain K12) GN=yebR PE=1 SV=2	P76270	0	0	0	0	1	0	0	0	0	0	0	0	0	0	0	0	0	0
Protein mtfA OS=Escherichia coli (strain K12) GN=mtfA PE=1 SV=2 - [MTFA_ECOLI]	P76346	0	0	0	0	0	0	0	0	0	0	0	0	0	0	0	0	0	0
Uncharacterized glycosyl hydrolase ycjT OS=Escherichia coli (strain K12) GN=ycjT PE=3 SV=1 - [YCJT_ECOLI]	P77154	0	0	0	0	0	0	0	0	0	0	0	0	0	0	0	0	0	0
Thiol:disulfide interchange protein DsbG OS=Escherichia coli (strain K12) GN=dsbG PE=1 SV=2	P77202	0	3	0	0	0	0	0	0	0	0	0	0	0	0	0	0	0	0
UPF0014 inner membrane protein ybbM OS=Escherichia coli (strain K12) GN=ybbM PE=1 SV=2 - [YBBM_ECOLI]	P77307	0	0	0	0	0	0	0	0	0	0	0	0	0	0	0	0	0	0
Putative dimethyl sulfoxide reductase chain ynfE OS=Escherichia coli (strain K12) GN=ynfE PE=3 SV=1	P77374	0	0	0	0	1	0	0	0	0	0	0	0	0	0	0	0	0	0
Protein maoC OS=Escherichia coli (strain K12) GN=maoC PE=2 SV=1 - [MAOC_ECOLI]	P77455	0	0	0	0	0	0	0	0	0	0	0	0	0	0	0	0	0	1
Uncharacterized ABC transporter permease ybbP OS=Escherichia coli (strain K12) GN=ybbP PE=3 SV=1 - [YBBP_ECOLI]	P77504	0	0	0	0	0	0	0	0	0	0	0	0	0	0	0	0	0	0
Gamma-glutamylputrescine synthetase PuuA OS=Escherichia coli (strain K12) GN=puuA PE=1 SV=2 - [PUUA_ECOLI]	P78061	0	0	0	0	0	0	0	0	0	0	0	0	0	0	0	0	0	0
Putative uncharacterized protein yghO (Fragment) OS=Escherichia coli (strain K12) GN=yghO PE=5 SV=2 - [YGHO_ECOLI]	Q46840	0	0	0	0	0	0	0	1	0	0	0	0	0	0	0	0	0	1
HTH-type transcriptional regulator cbl OS=Escherichia coli (strain K12) GN=cbl PE=1 SV=2	Q47083	0	0	0	0	0	0	0	0	1	0	0	0	0	0	0	0	0	0
Putative protein mbhA OS=Escherichia coli (strain K12) GN=mbhA PE=5 SV=1 - [MBHA_ECOLI]	Q47154	0	0	0	0	0	0	0	0	0	0	0	0	0	0	0	0	0	0
