# Supplementary material for: Transient protein-protein interactions perturb E. coli metabolome and cause gene dosage toxicity
Source: eLife. 2016 Dec 10;5:e20309. doi: 10.7554/eLife.20309 (PMC5176355; doi:10.7554/eLife.20309)
Supplement: Figure 5—source data 2. — DOI: http://dx.doi.org/10.7554/eLife.20309.015 [file elife-20309-fig5-data2.xlsx]

## Sheet: all partners
Figure 5 Source Data 2: Consolidated list of binding partners of EcDHFR detected using anti-his and/or anti-EcDHFR antibodies
a List excludes ribosomal proteins and associated elongation factors
b 1 indicates detected by IP, 0 indicates not detected by IP
Description a	Accession	anti-6×his Ab IP b	anti-EcDHFR Ab IP b
2,3-bisphosphoglycerate-dependent phosphoglycerate mutase OS=Escherichia coli (strain K12) GN=gpmA PE=1 SV=2 - [GPMA_ECOLI]	P62707	1	1
Adenylosuccinate synthetase OS=Escherichia coli (strain K12) GN=purA PE=1 SV=2	P0A7D4	1	1
Bifunctional purine biosynthesis protein PurH OS=Escherichia coli (strain K12) GN=purH PE=1 SV=1	P15639	1	1
Cysteine synthase A OS=Escherichia coli (strain K12) GN=cysK PE=1 SV=2	P0ABK5	1	1
Dihydrofolate reductase OS=Escherichia coli (strain K12) GN=folA PE=1 SV=1	P0ABQ4	1	1
DNA-binding protein HU-alpha OS=Escherichia coli (strain K12) GN=hupA PE=1 SV=1	P0ACF0	1	1
Enamine/imine deaminase OS=Escherichia coli (strain K12) GN=ridA PE=1 SV=2	P0AF93	1	1
Enolase OS=Escherichia coli (strain K12) GN=eno PE=1 SV=2	P0A6P9	1	1
Fe/S biogenesis protein NfuA OS=Escherichia coli (strain K12) GN=nfuA PE=1 SV=1	P63020	1	1
Fructose-bisphosphate aldolase class 2 OS=Escherichia coli (strain K12) GN=fbaA PE=1 SV=2	P0AB71	1	1
Glucose-specific phosphotransferase enzyme IIA component OS=Escherichia coli (strain K12) GN=crr PE=1 SV=2	P69783	1	1
Glyceraldehyde-3-phosphate dehydrogenase A OS=Escherichia coli (strain K12) GN=gapA PE=1 SV=2	P0A9B2	1	1
HTH-type transcriptional repressor AllR OS=Escherichia coli (strain K12) GN=allR PE=1 SV=1	P0ACN4	1	1
Iron-sulfur cluster insertion protein ErpA OS=Escherichia coli (strain K12) GN=erpA PE=1 SV=1	P0ACC3	1	1
Leucine-responsive regulatory protein OS=Escherichia coli (strain K12) GN=lrp PE=1 SV=2	P0ACJ0	1	1
Malate dehydrogenase OS=Escherichia coli (strain K12) GN=mdh PE=1 SV=1	P61889	1	1
Malate synthase A OS=Escherichia coli (strain K12) GN=aceB PE=1 SV=1	P08997	1	1
NifU-like protein OS=Escherichia coli (strain K12) GN=nifU PE=1 SV=1	P0ACD4	1	1
pep chain release factor 2 OS=Escherichia coli (strain K12) GN=prfB PE=1 SV=3 - [RF2_ECOLI]	P07012	1	1
Phosphoglycerate kinase OS=Escherichia coli (strain K12) GN=pgk PE=1 SV=2	P0A799	1	1
Phosphoribosylamine--glycine ligase OS=Escherichia coli (strain K12) GN=purD PE=1 SV=2	P15640	1	1
Protein RecA OS=Escherichia coli (strain K12) GN=recA PE=1 SV=2	P0A7G6	1	1
Protein YdgH OS=Escherichia coli (strain K12) GN=ydgH PE=1 SV=1	P76177	1	1
Ribose-5-phosphate isomerase A OS=Escherichia coli (strain K12) GN=rpiA PE=1 SV=1	P0A7Z0	1	1
Serine hydroxymethyltransferase OS=Escherichia coli (strain K12) GN=glyA PE=1 SV=1	P0A825	1	1
Transaldolase A OS=Escherichia coli (strain K12) GN=talA PE=1 SV=1	P0A867	1	1
Transaldolase B OS=Escherichia coli (strain K12) GN=talB PE=1 SV=2	P0A870	1	1
Uncharacterized ABC transporter ATP-binding protein YjjK OS=Escherichia coli (strain K12) GN=yjjK PE=1 SV=2	P0A9W3	1	1
UPF0438 protein YifE OS=Escherichia coli (strain K12) GN=yifE PE=1 SV=2	P0ADN2	1	1
Aldehyde-alcohol dehydrogenase OS=Escherichia coli (strain K12) GN=adhE PE=1 SV=2	P0A9Q7	1	0
Aspartate--ammonia ligase OS=Escherichia coli (strain K12) GN=asnA PE=1 SV=1	P00963	1	0
Deoxyribose operon repressor OS=Escherichia coli (strain K12) GN=deoR PE=1 SV=1	P0ACK5	1	0
Isocitrate dehydrogenase [NADP] OS=Escherichia coli (strain K12) GN=icd PE=1 SV=1	P08200	1	0
Phosphoadenosine phosphosulfate reductase OS=Escherichia coli (strain K12) GN=cysH PE=1 SV=3	P17854	1	0
Phosphoenolpyruvate-protein phosphotransferase OS=Escherichia coli (strain K12) GN=ptsI PE=1 SV=1	P08839	1	0
Phosphoribosylglycinamide formyltransferase 2 OS=Escherichia coli (strain K12) GN=purT PE=1 SV=3	P33221	1	0
Probable deferrochelatase/peroxidase YfeX OS=Escherichia coli (strain K12) GN=yfeX PE=1 SV=2	P76536	1	0
Probable GTP-binding protein EngB OS=Escherichia coli (strain K12) GN=engB PE=1 SV=1	P0A6P7	1	0
Probable transcriptional regulatory protein YebC OS=Escherichia coli (strain K12) GN=yebC PE=1 SV=1	P0A8A0	1	0
Ribosome modulation factor OS=Escherichia coli (strain K12) GN=rmf PE=1 SV=1	P0AFW2	1	0
tRNA (guanosine(18)-2'-O)-methyltransferase OS=Escherichia coli (strain K12) GN=trmH PE=1 SV=1	P0AGJ2	1	0
[Protein-PII] uridylyltransferase OS=Escherichia coli (strain K12) GN=glnD PE=3 SV=2 - [GLND_ECOLI]	P27249	0	1
2,3,4,5-tetrahydropyridine-2,6-dicarboxylate N-succinyltransferase OS=Escherichia coli (strain K12) GN=dapD PE=1 SV=1 - [DAPD_ECOLI]	P0A9D8	0	1
2,3-bisphosphoglycerate-independent phosphoglycerate mutase OS=Escherichia coli (strain K12) GN=gpmI PE=1 SV=1 - [GPMI_ECOLI]	P37689	0	1
2-amino-3-ketobutyrate coenzyme A ligase OS=Escherichia coli (strain K12) GN=kbl PE=1 SV=1 - [KBL_ECOLI]	P0AB77	0	1
2-octaprenyl-6-methoxyphenol hydroxylase OS=Escherichia coli (strain K12) GN=ubiH PE=1 SV=2 - [UBIH_ECOLI]	P25534	0	1
3-dehydroquinate synthase OS=Escherichia coli (strain K12) GN=aroB PE=3 SV=1 - [AROB_ECOLI]	P07639	0	1
3-hydroxydecanoyl-[acyl-carrier-protein] dehydratase OS=Escherichia coli (strain K12) GN=fabA PE=1 SV=2	P0A6Q3	0	1
3-oxoacyl-[acyl-carrier-protein] reductase FabG OS=Escherichia coli (strain K12) GN=fabG PE=1 SV=1	P0AEK2	0	1
4-hydroxy-3-methylbut-2-en-1-yl diphosphate synthase OS=Escherichia coli (strain K12) GN=ispG PE=1 SV=1 - [ISPG_ECOLI]	P62620	0	1
5,10-methylenetetrahydrofolate reductase OS=Escherichia coli (strain K12) GN=metF PE=1 SV=1	P0AEZ1	0	1
5'-methylthioadenosine/S-adenosylhomocysteine nucleosidase OS=Escherichia coli (strain K12) GN=mtnN PE=1 SV=1 - [MTNN_ECOLI]	P0AF12	0	1
60 kDa chaperonin OS=Escherichia coli (strain K12) GN=groL PE=1 SV=2	P0A6F5	0	1
6-phosphogluconate dehydrogenase, decarboxylating OS=Escherichia coli (strain K12) GN=gnd PE=1 SV=2 - [6PGD_ECOLI]	P00350	0	1
6-phosphogluconolactonase OS=Escherichia coli (strain K12) GN=pgl PE=1 SV=2	P52697	0	1
Aconitate hydratase 2 OS=Escherichia coli (strain K12) GN=acnB PE=1 SV=3	P36683	0	1
Acyl carrier protein OS=Escherichia coli (strain K12) GN=acpP PE=1 SV=2	P0A6A8	0	1
Aerobic respiration control protein ArcA OS=Escherichia coli (strain K12) GN=arcA PE=1 SV=1 - [ARCA_ECOLI]	P0A9Q1	0	1
Alanyl-tRNA synthetase OS=Escherichia coli (strain K12) GN=alaS PE=1 SV=2 - [SYA_ECOLI]	P00957	0	1
Anthranilate synthase component 1 OS=Escherichia coli (strain K12) GN=trpE PE=1 SV=2 - [TRPE_ECOLI]	P00895	0	1
Asparagine synthetase B [glutamine-hydrolyzing] OS=Escherichia coli (strain K12) GN=asnB PE=1 SV=3 - [ASNB_ECOLI]	P22106	0	1
Asparaginyl-tRNA synthetase OS=Escherichia coli (strain K12) GN=asnS PE=1 SV=2 - [SYN_ECOLI]	P0A8M0	0	1
Aspartate aminotransferase OS=Escherichia coli (strain K12) GN=aspC PE=1 SV=1	P00509	0	1
ATP synthase subunit beta OS=Escherichia coli (strain K12) GN=atpD PE=1 SV=2 - [ATPB_ECOLI]	P0ABB4	0	1
Bifunctional aspartokinase/homoserine dehydrogenase 1 OS=Escherichia coli (strain K12) GN=thrA PE=1 SV=2	P00561	0	1
Bifunctional protein folC OS=Escherichia coli (strain K12) GN=folC PE=1 SV=2	P08192	0	1
Bifunctional protein FolD OS=Escherichia coli (strain K12) GN=folD PE=1 SV=4 - [FOLD_ECOLI]	P24186	0	1
Bifunctional protein GlmU OS=Escherichia coli (strain K12) GN=glmU PE=1 SV=1 - [GLMU_ECOLI]	P0ACC7	0	1
Capsular synthesis regulator component B OS=Escherichia coli (strain K12) GN=rcsB PE=1 SV=1	P69407	0	1
Carbonic anhydrase 2 OS=Escherichia coli (strain K12) GN=can PE=1 SV=1 - [CAN_ECOLI]	P61517	0	1
Cell division ATP-binding protein FtsE OS=Escherichia coli (strain K12) GN=ftsE PE=1 SV=1	P0A9R7	0	1
Cell division protein FtsA OS=Escherichia coli (strain K12) GN=ftsA PE=3 SV=1	P0ABH0	0	1
Cell division protein FtsZ OS=Escherichia coli (strain K12) GN=ftsZ PE=1 SV=1 - [FTSZ_ECOLI]	P0A9A6	0	1
Cell division protein ZapA OS=Escherichia coli (strain K12) GN=zapA PE=1 SV=1 - [ZAPA_ECOLI]	P0ADS2	0	1
Cell division topological specificity factor OS=Escherichia coli (strain K12) GN=minE PE=1 SV=1 - [MINE_ECOLI]	P0A734	0	1
Chaperone protein hchA OS=Escherichia coli (strain K12) GN=hchA PE=1 SV=3 - [HCHA_ECOLI]	P31658	0	1
Chaperone protein hscA OS=Escherichia coli (strain K12) GN=hscA PE=1 SV=1 - [HSCA_ECOLI]	P0A6Z1	0	1
Chaperone protein skp OS=Escherichia coli (strain K12) GN=skp PE=1 SV=1 - [SKP_ECOLI]	P0AEU7	0	1
Chaperone surA OS=Escherichia coli (strain K12) GN=surA PE=1 SV=1 - [SURA_ECOLI]	P0ABZ6	0	1
Chromosome initiation inhibitor OS=Escherichia coli (strain K12) GN=iciA PE=1 SV=1	P0A8S1	0	1
Cold shock-like protein CspC OS=Escherichia coli (strain K12) GN=cspC PE=1 SV=2 - [CSPC_ECOLI]	P0A9Y6	0	1
Cysteine desulfurase OS=Escherichia coli (strain K12) GN=iscS PE=1 SV=1	P0A6B7	0	1
Cysteinyl-tRNA synthetase OS=Escherichia coli (strain K12) GN=cysS PE=1 SV=2 - [SYC_ECOLI]	P21888	0	1
D-alanyl-D-alanine carboxypeptidase dacB OS=Escherichia coli (strain K12) GN=dacB PE=1 SV=2 - [DACB_ECOLI]	P24228	0	1
D-amino acid dehydrogenase small subunit OS=Escherichia coli (strain K12) GN=dadA PE=2 SV=1 - [DADA_ECOLI]	P0A6J5	0	1
Deoxyuridine 5'-triphosphate nucleotidohydrolase OS=Escherichia coli (strain K12) GN=dut PE=1 SV=1	P06968	0	1
Dihydrolipoyl dehydrogenase OS=Escherichia coli (strain K12) GN=lpdA PE=1 SV=2 - [DLDH_ECOLI]	P0A9P0	0	1
DNA gyrase subunit A OS=Escherichia coli (strain K12) GN=gyrA PE=1 SV=1 - [GYRA_ECOLI]	P0AES4	0	1
DNA gyrase subunit B OS=Escherichia coli (strain K12) GN=gyrB PE=1 SV=2 - [GYRB_ECOLI]	P0AES6	0	1
DNA protection during starvation protein OS=Escherichia coli (strain K12) GN=dps PE=1 SV=2 - [DPS_ECOLI]	P0ABT2	0	1
DNA replication terminus site-binding protein OS=Escherichia coli (strain K12) GN=tus PE=1 SV=1 - [TUS_ECOLI]	P16525	0	1
DNA-binding protein H-NS OS=Escherichia coli (strain K12) GN=hns PE=1 SV=2	P0ACF8	0	1
D-serine/D-alanine/glycine transporter OS=Escherichia coli (strain K12) GN=cycA PE=1 SV=1 - [CYCA_ECOLI]	P0AAE0	0	1
Ferric uptake regulation protein OS=Escherichia coli (strain K12) GN=fur PE=1 SV=1 - [FUR_ECOLI]	P0A9A9	0	1
Ferrochelatase OS=Escherichia coli (strain K12) GN=hemH PE=1 SV=3 - [HEMH_ECOLI]	P23871	0	1
FKBP-type 22 kDa peptidyl-prolyl cis-trans isomerase OS=Escherichia coli (strain K12) GN=fklB PE=1 SV=2	P0A9L3	0	1
FKBP-type peptidyl-prolyl cis-trans isomerase fkpA OS=Escherichia coli (strain K12) GN=fkpA PE=1 SV=1 - [FKBA_ECOLI]	P45523	0	1
FKBP-type peptidyl-prolyl cis-trans isomerase slyD OS=Escherichia coli (strain K12) GN=slyD PE=1 SV=1 - [SLYD_ECOLI]	P0A9K9	0	1
Flagellar brake protein YcgR OS=Escherichia coli (strain K12) GN=ycgR PE=1 SV=1 - [YCGR_ECOLI]	P76010	0	1
G/U mismatch-specific DNA glycosylase OS=Escherichia coli (strain K12) GN=mug PE=1 SV=1 - [MUG_ECOLI]	P0A9H1	0	1
Glucosamine--fructose-6-phosphate aminotransferase [isomerizing] OS=Escherichia coli (strain K12) GN=glmS PE=1 SV=4 - [GLMS_ECOLI]	P17169	0	1
Glutamate racemase OS=Escherichia coli (strain K12) GN=murI PE=1 SV=2 - [MURI_ECOLI]	P22634	0	1
Glutamate/aspartate transport system permease protein gltJ OS=Escherichia coli (strain K12) GN=gltJ PE=3 SV=1 - [GLTJ_ECOLI]	P0AER3	0	1
Glutamate-1-semialdehyde 2,1-aminomutase OS=Escherichia coli (strain K12) GN=hemL PE=1 SV=2 - [GSA_ECOLI]	P23893	0	1
Glutamate--tRNA ligase OS=Escherichia coli (strain K12) GN=gltX PE=1 SV=1	P04805	0	1
Glutamine transport ATP-binding protein GlnQ OS=Escherichia coli (strain K12) GN=glnQ PE=1 SV=1 - [GLNQ_ECOLI]	P10346	0	1
Glutaredoxin-4 OS=Escherichia coli (strain K12) GN=grxD PE=1 SV=1	P0AC69	0	1
Glutathione-binding protein gsiB OS=Escherichia coli (strain K12) GN=gsiB PE=1 SV=1	P75797	0	1
Glycine--tRNA ligase beta subunit OS=Escherichia coli (strain K12) GN=glyS PE=1 SV=4	P00961	0	1
Glycyl-tRNA synthetase alpha subunit OS=Escherichia coli (strain K12) GN=glyQ PE=1 SV=2 - [SYGA_ECOLI]	P00960	0	1
GMP synthase [glutamine-hydrolyzing] OS=Escherichia coli (strain K12) GN=guaA PE=1 SV=1 - [GUAA_ECOLI]	P04079	0	1
GTP pyrophosphokinase OS=Escherichia coli (strain K12) GN=relA PE=1 SV=1	P0AG20	0	1
Helicase IV OS=Escherichia coli (strain K12) GN=helD PE=1 SV=2 - [HELD_ECOLI]	P15038	0	1
High frequency lysogenization protein HflD OS=Escherichia coli (strain K12) GN=hflD PE=1 SV=1 - [HFLD_ECOLI]	P25746	0	1
Holliday junction ATP-dependent DNA helicase RuvB OS=Escherichia coli (strain K12) GN=ruvB PE=1 SV=1	P0A812	0	1
Hydrogenase isoenzymes formation protein hypE OS=Escherichia coli (strain K12) GN=hypE PE=1 SV=2 - [HYPE_ECOLI]	P24193	0	1
Inner membrane protein yfdC OS=Escherichia coli (strain K12) GN=yfdC PE=1 SV=1	P37327	0	1
Inorganic pyrophosphatase OS=Escherichia coli (strain K12) GN=ppa PE=1 SV=2	P0A7A9	0	1
Inositol-1-monophosphatase OS=Escherichia coli (strain K12) GN=suhB PE=1 SV=1	P0ADG4	0	1
Isoform Alpha' of Ribonucleoside-diphosphate reductase 1 subunit alpha OS=Escherichia coli (strain K12) GN=nrdA - [RIR1_ECOLI]	P00452	0	1
Isoform Alpha' of Ribonucleoside-diphosphate reductase 1 subunit alpha OS=Escherichia coli (strain K12) GN=nrdA - [RIR1_ECOLI]	P00452-2	0	1
Isoleucyl-tRNA synthetase OS=Escherichia coli (strain K12) GN=ileS PE=1 SV=5 - [SYI_ECOLI]	P00956	0	1
Leu/Ile/Val-binding protein OS=Escherichia coli (strain K12) GN=livJ PE=1 SV=1	P0AD96	0	1
Lipopolysaccharide biosynthesis protein rffA OS=Escherichia coli (strain K12) GN=rffA PE=3 SV=2 - [RFFA_ECOLI]	P27833	0	1
Lipopolysaccharide export system ATP-binding protein LptB OS=Escherichia coli (strain K12) GN=lptB PE=1 SV=2 - [LPTB_ECOLI]	P0A9V1	0	1
Lipoprotein 34 OS=Escherichia coli (strain K12) GN=nlpB PE=1 SV=1	P0A903	0	1
Lipoprotein yfgL OS=Escherichia coli (strain K12) GN=yfgL PE=1 SV=1 - [YFGL_ECOLI]	P77774	0	1
Lipoprotein-releasing system ATP-binding protein LolD OS=Escherichia coli (strain K12) GN=lolD PE=1 SV=2 - [LOLD_ECOLI]	P75957	0	1
Lipoyl synthase OS=Escherichia coli (strain K12) GN=lipA PE=1 SV=1 - [LIPA_ECOLI]	P60716	0	1
Lysyl-tRNA synthetase OS=Escherichia coli (strain K12) GN=lysS PE=1 SV=2 - [SYK1_ECOLI]	P0A8N3	0	1
Lysyl-tRNA synthetase, heat inducible OS=Escherichia coli (strain K12) GN=lysU PE=1 SV=2 - [SYK2_ECOLI]	P0A8N5	0	1
Molybdenum cofactor biosynthesis protein B OS=Escherichia coli (strain K12) GN=moaB PE=1 SV=2	P0AEZ9	0	1
NADH dehydrogenase OS=Escherichia coli (strain K12) GN=ndh PE=1 SV=2 - [DHNA_ECOLI]	P00393	0	1
Nitrate/nitrite response regulator protein NarL OS=Escherichia coli (strain K12) GN=narL PE=1 SV=1	P0AF28	0	1
Oligopep transport ATP-binding protein OppD OS=Escherichia coli (strain K12) GN=oppD PE=3 SV=2 - [OPPD_ECOLI]	P76027	0	1
Oligopep transport ATP-binding protein OppF OS=Escherichia coli (strain K12) GN=oppF PE=3 SV=1 - [OPPF_ECOLI]	P77737	0	1
Osmotically-inducible protein Y OS=Escherichia coli (strain K12) GN=osmY PE=1 SV=1 - [OSMY_ECOLI]	P0AFH8	0	1
Outer membrane protein A OS=Escherichia coli (strain K12) GN=ompA PE=1 SV=1 - [OMPA_ECOLI]	P0A910	0	1
Outer membrane protein assembly factor yaeT OS=Escherichia coli (strain K12) GN=yaeT PE=1 SV=1 - [YAET_ECOLI]	P0A940	0	1
Outer membrane usher protein fimD OS=Escherichia coli (strain K12) GN=fimD PE=1 SV=2	P30130	0	1
Oxygen-insensitive NAD(P)H nitroreductase OS=Escherichia coli (strain K12) GN=nfnB PE=1 SV=1	P38489	0	1
pep methionine sulfoxide reductase MsrA OS=Escherichia coli (strain K12) GN=msrA PE=1 SV=2 - [MSRA_ECOLI]	P0A744	0	1
pep methionine sulfoxide reductase MsrB OS=Escherichia coli (strain K12) GN=msrB PE=1 SV=1 - [MSRB_ECOLI]	P0A746	0	1
pep transport system ATP-binding protein SapF OS=Escherichia coli (strain K12) GN=sapF PE=3 SV=1 - [SAPF_ECOLI]	P0AAH8	0	1
Peptidyl-prolyl cis-trans isomerase B OS=Escherichia coli (strain K12) GN=ppiB PE=1 SV=2	P23869	0	1
Peptidyl-prolyl cis-trans isomerase C OS=Escherichia coli (strain K12) GN=ppiC PE=1 SV=2 - [PPIC_ECOLI]	P0A9L5	0	1
Periplasmic oligopep-binding protein OS=Escherichia coli (strain K12) GN=oppA PE=1 SV=2 - [OPPA_ECOLI]	P23843	0	1
Periplasmic protein CpxP OS=Escherichia coli (strain K12) GN=cpxP PE=1 SV=1 - [CPXP_ECOLI]	P0AE85	0	1
Peroxiredoxin osmC OS=Escherichia coli (strain K12) GN=osmC PE=1 SV=2 - [OSMC_ECOLI]	P0C0L2	0	1
Phosphate import ATP-binding protein PstB OS=Escherichia coli (strain K12) GN=pstB PE=1 SV=2 - [PSTB_ECOLI]	P0AAH0	0	1
Phosphoenolpyruvate synthase OS=Escherichia coli (strain K12) GN=ppsA PE=1 SV=5 - [PPSA_ECOLI]	P23538	0	1
Phosphopentomutase OS=Escherichia coli (strain K12) GN=deoB PE=1 SV=1	P0A6K6	0	1
Phosphoribosylaminoimidazole-succinocarboxamide synthase OS=Escherichia coli (strain K12) GN=purC PE=1 SV=1	P0A7D7	0	1
Phosphoribosylformylglycinamidine cyclo-ligase OS=Escherichia coli (strain K12) GN=purM PE=1 SV=3	P08178	0	1
p-hydroxybenzoic acid efflux pump subunit AaeA OS=Escherichia coli (strain K12) GN=aaeA PE=2 SV=1 - [AAEA_ECOLI]	P46482	0	1
Probable 9-O-acetyl-N-acetylneuraminic acid deacetylase OS=Escherichia coli (strain K12) GN=nanS PE=2 SV=1	P39370	0	1
Probable L,D-transpeptidase YbiS OS=Escherichia coli (strain K12) GN=ybiS PE=1 SV=1 - [YBIS_ECOLI]	P0AAX8	0	1
Probable phosphoglycerate mutase gpmB OS=Escherichia coli (strain K12) GN=gpmB PE=3 SV=1 - [GPMB_ECOLI]	P0A7A2	0	1
Probable tRNA threonylcarbamoyladenosine biosynthesis protein Gcp OS=Escherichia coli (strain K12) GN=gcp PE=1 SV=2 - [GCP_ECOLI]	P05852	0	1
Proline--tRNA ligase OS=Escherichia coli (strain K12) GN=proS PE=1 SV=4	P16659	0	1
Protein tdcF OS=Escherichia coli (strain K12) GN=tdcF PE=1 SV=1	P0AGL2	0	1
Protein tolB OS=Escherichia coli (strain K12) GN=tolB PE=1 SV=1 - [TOLB_ECOLI]	P0A855	0	1
Protein tonB OS=Escherichia coli (strain K12) GN=tonB PE=1 SV=2 - [TONB_ECOLI]	P02929	0	1
Protein translocase subunit SecA OS=Escherichia coli (strain K12) GN=secA PE=1 SV=2 - [SECA_ECOLI]	P10408	0	1
Protein translocase subunit SecD OS=Escherichia coli (strain K12) GN=secD PE=1 SV=1	P0AG90	0	1
Protein yebR OS=Escherichia coli (strain K12) GN=yebR PE=1 SV=2	P76270	0	1
Protein-export protein SecB OS=Escherichia coli (strain K12) GN=secB PE=1 SV=1 - [SECB_ECOLI]	P0AG86	0	1
Putative dimethyl sulfoxide reductase chain ynfE OS=Escherichia coli (strain K12) GN=ynfE PE=3 SV=1	P77374	0	1
Putative glyceraldehyde-3-phosphate dehydrogenase C OS=Escherichia coli (strain K12) GN=gapC PE=5 SV=2	P33898	0	1
Putative peroxiredoxin bcp OS=Escherichia coli (strain K12) GN=bcp PE=1 SV=1	P0AE52	0	1
Putative uncharacterized protein yifN OS=Escherichia coli (strain K12) GN=yifN PE=5 SV=1 - [YIFN_ECOLI]	P56259	0	1
Pyridoxine kinase OS=Escherichia coli (strain K12) GN=pdxK PE=1 SV=2	P40191	0	1
Pyridoxine/pyridoxamine 5'-phosphate oxidase OS=Escherichia coli (strain K12) GN=pdxH PE=1 SV=2	P0AFI7	0	1
Pyruvate kinase I OS=Escherichia coli (strain K12) GN=pykF PE=1 SV=1	P0AD61	0	1
Response regulator uvrY OS=Escherichia coli (strain K12) GN=uvrY PE=1 SV=1 - [UVRY_ECOLI]	P0AED5	0	1
Ribose-phosphate pyrophosphokinase OS=Escherichia coli (strain K12) GN=prs PE=1 SV=2	P0A717	0	1
Ribosomal RNA large subunit methyltransferase N OS=Escherichia coli (strain K12) GN=rlmN PE=1 SV=1	P36979	0	1
Ribosomal RNA small subunit methyltransferase B OS=Escherichia coli (strain K12) GN=rsmB PE=1 SV=2	P36929	0	1
Rod shape-determining protein MreB OS=Escherichia coli (strain K12) GN=mreB PE=1 SV=1 - [MREB_ECOLI]	P0A9X4	0	1
S-adenosylmethionine synthase OS=Escherichia coli (strain K12) GN=metK PE=1 SV=2	P0A817	0	1
Septum site-determining protein MinD OS=Escherichia coli (strain K12) GN=minD PE=1 SV=2 - [MIND_ECOLI]	P0AEZ3	0	1
Serine--tRNA ligase OS=Escherichia coli (strain K12) GN=serS PE=1 SV=1	P0A8L1	0	1
Sigma factor-binding protein crl OS=Escherichia coli (strain K12) GN=crl PE=1 SV=5 - [CRL_ECOLI]	P24251	0	1
Soluble lytic murein transglycosylase OS=Escherichia coli (strain K12) GN=slt PE=1 SV=1 - [SLT_ECOLI]	P0AGC3	0	1
Spheroplast protein Y OS=Escherichia coli (strain K12) GN=spy PE=1 SV=1 - [SPY_ECOLI]	P77754	0	1
S-ribosylhomocysteine lyase OS=Escherichia coli (strain K12) GN=luxS PE=1 SV=3 - [LUXS_ECOLI]	P45578	0	1
Succinate dehydrogenase flavoprotein subunit OS=Escherichia coli (strain K12) GN=sdhA PE=1 SV=1	P0AC41	0	1
Succinate dehydrogenase iron-sulfur subunit OS=Escherichia coli (strain K12) GN=sdhB PE=1 SV=1 - [DHSB_ECOLI]	P07014	0	1
Superoxide dismutase [Fe] OS=Escherichia coli (strain K12) GN=sodB PE=1 SV=2	P0AGD3	0	1
Thiol:disulfide interchange protein DsbC OS=Escherichia coli (strain K12) GN=dsbC PE=1 SV=1 - [DSBC_ECOLI]	P0AEG6	0	1
Thioredoxin-1 OS=Escherichia coli (strain K12) GN=trxA PE=1 SV=2	P0AA25	0	1
Thymidine kinase OS=Escherichia coli (strain K12) GN=tdk PE=3 SV=1	P23331	0	1
Thymidine phosphorylase OS=Escherichia coli (strain K12) GN=deoA PE=1 SV=3	P07650	0	1
Transcription elongation protein nusA OS=Escherichia coli (strain K12) GN=nusA PE=1 SV=1 - [NUSA_ECOLI]	P0AFF6	0	1
Transcription termination factor Rho OS=Escherichia coli (strain K12) GN=rho PE=1 SV=1	P0AG30	0	1
Transcriptional regulator kdgR OS=Escherichia coli (strain K12) GN=kdgR PE=1 SV=1 - [KDGR_ECOLI]	P76268	0	1
Transcriptional regulatory protein CpxR OS=Escherichia coli (strain K12) GN=cpxR PE=3 SV=1	P0AE88	0	1
Transcriptional regulatory protein OmpR OS=Escherichia coli (strain K12) GN=ompR PE=1 SV=1 - [OMPR_ECOLI]	P0AA16	0	1
Transcriptional regulatory protein phoP OS=Escherichia coli (strain K12) GN=phoP PE=1 SV=1	P23836	0	1
Translation initiation factor IF-3 OS=Escherichia coli (strain K12) GN=infC PE=1 SV=1 - [IF3_ECOLI]	P0A707	0	1
Trigger factor OS=Escherichia coli (strain K12) GN=tig PE=1 SV=1	P0A850	0	1
tRNA dimethylallyltransferase OS=Escherichia coli (strain K12) GN=miaA PE=1 SV=2 - [MIAA_ECOLI]	P16384	0	1
Tryptophan biosynthesis protein TrpCF OS=Escherichia coli (strain K12) GN=trpC PE=1 SV=3	P00909	0	1
Tryptophan synthase alpha chain OS=Escherichia coli (strain K12) GN=trpA PE=1 SV=1	P0A877	0	1
Tryptophan--tRNA ligase OS=Escherichia coli (strain K12) GN=trpS PE=1 SV=3	P00954	0	1
Type I restriction enzyme EcoKI M protein OS=Escherichia coli (strain K12) GN=hsdM PE=1 SV=1	P08957	0	1
Tyrosyl-tRNA synthetase OS=Escherichia coli (strain K12) GN=tyrS PE=1 SV=2 - [SYY_ECOLI]	P0AGJ9	0	1
Ubiquinone/menaquinone biosynthesis methyltransferase ubiE OS=Escherichia coli (strain K12) GN=ubiE PE=1 SV=1 - [UBIE_ECOLI]	P0A887	0	1
UDP-N-acetylglucosamine 1-carboxyvinyltransferase OS=Escherichia coli (strain K12) GN=murA PE=1 SV=1 - [MURA_ECOLI]	P0A749	0	1
Uncharacterized ABC transporter ATP-binding protein YadG OS=Escherichia coli (strain K12) GN=yadG PE=3 SV=1 - [YADG_ECOLI]	P36879	0	1
Uncharacterized ABC transporter ATP-binding protein YejF OS=Escherichia coli (strain K12) GN=yejF PE=3 SV=1	P33916	0	1
Uncharacterized ABC transporter ATP-binding protein YheS OS=Escherichia coli (strain K12) GN=yheS PE=1 SV=1 - [YHES_ECOLI]	P63389	0	1
Uncharacterized aminotransferase YfbQ OS=Escherichia coli (strain K12) GN=yfbQ PE=3 SV=1 - [YFBQ_ECOLI]	P0A959	0	1
Uncharacterized GST-like protein yghU OS=Escherichia coli (strain K12) GN=yghU PE=1 SV=2 - [YGHU_ECOLI]	Q46845	0	1
Uncharacterized lipoprotein yehR OS=Escherichia coli (strain K12) GN=yehR PE=1 SV=2 - [YEHR_ECOLI]	P33354	0	1
Uncharacterized protein ybeL OS=Escherichia coli (strain K12) GN=ybeL PE=4 SV=1	P0AAT9	0	1
Uncharacterized protein ybgS OS=Escherichia coli (strain K12) GN=ybgS PE=4 SV=1	P0AAV6	0	1
Uncharacterized protein ycbL OS=Escherichia coli (strain K12) GN=ycbL PE=3 SV=1	P75849	0	1
Uncharacterized protein yeaG OS=Escherichia coli (strain K12) GN=yeaG PE=3 SV=1 - [YEAG_ECOLI]	P0ACY3	0	1
Uncharacterized protein yefG OS=Escherichia coli (strain K12) GN=yefG PE=4 SV=1 - [YEFG_ECOLI]	P37749	0	1
Uncharacterized protein yejA OS=Escherichia coli (strain K12) GN=yejA PE=4 SV=3 - [YEJA_ECOLI]	P33913	0	1
Uncharacterized protein yfeH OS=Escherichia coli (strain K12) GN=yfeH PE=4 SV=2 - [YFEH_ECOLI]	P39836	0	1
Uncharacterized protein ygaU OS=Escherichia coli (strain K12) GN=ygaU PE=1 SV=2 - [YGAU_ECOLI]	P0ADE6	0	1
Uncharacterized protein YncE OS=Escherichia coli (strain K12) GN=yncE PE=1 SV=1 - [YNCE_ECOLI]	P76116	0	1
Uncharacterized protein ypfJ OS=Escherichia coli (strain K12) GN=ypfJ PE=4 SV=1	P64429	0	1
Uncharacterized symporter ydjN OS=Escherichia coli (strain K12) GN=ydjN PE=3 SV=1 - [YDJN_ECOLI]	P77529	0	1
Uncharacterized zinc-type alcohol dehydrogenase-like protein YahK OS=Escherichia coli (strain K12) GN=yahK PE=1 SV=1 - [YAHK_ECOLI]	P75691	0	1
Universal stress protein G OS=Escherichia coli (strain K12) GN=uspG PE=1 SV=2 - [USPG_ECOLI]	P39177	0	1
UPF0227 protein ycfP OS=Escherichia coli (strain K12) GN=ycfP PE=3 SV=1	P0A8E1	0	1
UPF0234 protein YajQ OS=Escherichia coli (strain K12) GN=yajQ PE=1 SV=2	P0A8E7	0	1
UPF0325 protein yaeH OS=Escherichia coli (strain K12) GN=yaeH PE=3 SV=1	P62768	0	1
Uracil phosphoribosyltransferase OS=Escherichia coli (strain K12) GN=upp PE=1 SV=1 - [UPP_ECOLI]	P0A8F0	0	1
Uridine kinase OS=Escherichia coli (strain K12) GN=udk PE=3 SV=1 - [URK_ECOLI]	P0A8F4	0	1
Zinc resistance-associated protein OS=Escherichia coli (strain K12) GN=zraP PE=1 SV=1 - [ZRAP_ECOLI]	P0AAA9	0	1

## Sheet: classification by function
	Classification of proteins by function
	a All proteins detected by either of the antibodies
	b Only proteins detected by both the antibodies
	c 1 indicates detected by IP, 0 indicates not detected by IP
	Description	Accession	anti-6×his Ab IP c	anti-EcDHFR Ab IP c
	Purine/pyrimidine biosynthesis/folate pathway a
	Adenylosuccinate synthetase OS=Escherichia coli (strain K12) GN=purA PE=1 SV=2	P0A7D4	1	1
	Bifunctional purine biosynthesis protein PurH OS=Escherichia coli (strain K12) GN=purH PE=1 SV=1	P15639	1	1
	Phosphoribosylamine--glycine ligase OS=Escherichia coli (strain K12) GN=purD PE=1 SV=2	P15640	1	1
	Serine hydroxymethyltransferase OS=Escherichia coli (strain K12) GN=glyA PE=1 SV=1	P0A825	1	1
	Phosphoribosylglycinamide formyltransferase 2 OS=Escherichia coli (strain K12) GN=purT PE=1 SV=3	P33221	1	0
	5,10-methylenetetrahydrofolate reductase OS=Escherichia coli (strain K12) GN=metF PE=1 SV=1	P0AEZ1	0	1
	Bifunctional protein folC OS=Escherichia coli (strain K12) GN=folC PE=1 SV=2	P08192	0	1
	Bifunctional protein FolD OS=Escherichia coli (strain K12) GN=folD PE=1 SV=4 - [FOLD_ECOLI]	P24186	0	1
	GMP synthase [glutamine-hydrolyzing] OS=Escherichia coli (strain K12) GN=guaA PE=1 SV=1 - [GUAA_ECOLI]	P04079	0	1
	Phosphoribosylaminoimidazole-succinocarboxamide synthase OS=Escherichia coli (strain K12) GN=purC PE=1 SV=1	P0A7D7	0	1
	Phosphoribosylformylglycinamidine cyclo-ligase OS=Escherichia coli (strain K12) GN=purM PE=1 SV=3	P08178	0	1
	S-adenosylmethionine synthase OS=Escherichia coli (strain K12) GN=metK PE=1 SV=2	P0A817	0	1
	5'-methylthioadenosine/S-adenosylhomocysteine nucleosidase OS=Escherichia coli (strain K12) GN=mtnN PE=1 SV=1 - [MTNN_ECOLI]	P0AF12	0	1
	Carbohydrate Metabolism b
	2,3-bisphosphoglycerate-dependent phosphoglycerate mutase OS=Escherichia coli (strain K12) GN=gpmA PE=1 SV=2 - [GPMA_ECOLI]	P62707	1	1
	Enolase OS=Escherichia coli (strain K12) GN=eno PE=1 SV=2	P0A6P9	1	1
	Fructose-bisphosphate aldolase class 2 OS=Escherichia coli (strain K12) GN=fbaA PE=1 SV=2	P0AB71	1	1
	Glucose-specific phosphotransferase enzyme IIA component OS=Escherichia coli (strain K12) GN=crr PE=1 SV=2	P69783	1	1
	Glyceraldehyde-3-phosphate dehydrogenase A OS=Escherichia coli (strain K12) GN=gapA PE=1 SV=2	P0A9B2	1	1
	Malate dehydrogenase OS=Escherichia coli (strain K12) GN=mdh PE=1 SV=1	P61889	1	1
	Malate synthase A OS=Escherichia coli (strain K12) GN=aceB PE=1 SV=1	P08997	1	1
	Phosphoglycerate kinase OS=Escherichia coli (strain K12) GN=pgk PE=1 SV=2	P0A799	1	1
	Ribose-5-phosphate isomerase A OS=Escherichia coli (strain K12) GN=rpiA PE=1 SV=1	P0A7Z0	1	1
	Transaldolase A OS=Escherichia coli (strain K12) GN=talA PE=1 SV=1	P0A867	1	1
	Transaldolase B OS=Escherichia coli (strain K12) GN=talB PE=1 SV=2	P0A870	1	1
	Amino acid biosynthesis b
	Cysteine synthase A OS=Escherichia coli (strain K12) GN=cysK PE=1 SV=2	P0ABK5	1	1
	Enamine/imine deaminase OS=Escherichia coli (strain K12) GN=ridA PE=1 SV=2	P0AF93	1	1
	Leucine-responsive regulatory protein OS=Escherichia coli (strain K12) GN=lrp PE=1 SV=2	P0ACJ0	1	1
	Serine hydroxymethyltransferase OS=Escherichia coli (strain K12) GN=glyA PE=1 SV=1	P0A825	1	1
	Stress Response b
	DNA-binding protein HU-alpha OS=Escherichia coli (strain K12) GN=hupA PE=1 SV=1	P0ACF0	1	1
	Enamine/imine deaminase OS=Escherichia coli (strain K12) GN=ridA PE=1 SV=2	P0AF93	1	1
	Fe/S biogenesis protein NfuA OS=Escherichia coli (strain K12) GN=nfuA PE=1 SV=1	P63020	1	1
	Protein RecA OS=Escherichia coli (strain K12) GN=recA PE=1 SV=2	P0A7G6	1	1
	UPF0438 protein YifE OS=Escherichia coli (strain K12) GN=yifE PE=1 SV=2	P0ADN2	1	1
	Miscellaneous b
	Iron-sulfur cluster insertion protein ErpA OS=Escherichia coli (strain K12) GN=erpA PE=1 SV=1	P0ACC3	1	1
	NifU-like protein OS=Escherichia coli (strain K12) GN=nifU PE=1 SV=1	P0ACD4	1	1
	pep chain release factor 2 OS=Escherichia coli (strain K12) GN=prfB PE=1 SV=3 - [RF2_ECOLI]	P07012	1	1
