# Supplementary material for: Transient protein-protein interactions perturb E. coli metabolome and cause gene dosage toxicity
Source: eLife. 2016 Dec 10;5:e20309. doi: 10.7554/eLife.20309 (PMC5176355; doi:10.7554/eLife.20309)
Supplement: Figure 7—source data 1. — DOI: http://dx.doi.org/10.7554/eLife.20309.020 [file elife-20309-fig7-data1.xlsx]

## Sheet: Sheet1
Figure 7-Source Data 1: Kinetic parameters for binding of purified purH and glyA proteins to surface immobilized DHFRs by surface plasmon resonance (Biacore)
		kon (M-1 s-1)	koff (s-1)	KD (M)
PurH	EcDHFR	9100	0.025	2.75e-06
	DHFR 6	8000	0.0236	3e-06
	DHFR 11	6400	0.021	3.3e-06
GlyA	EcDHFR	2450	0.0196	8e-06
	DHFR 6	3900	0.0205	5.3e-06
	DHFR 11	5900	0.0236	4e-06
